# Supplementary material
Source: PubMed Central journal article supplement (PMC7522780)
Supplement: jamainternmed-e204153-s003.pdf [file jamainternmed-e204153-s003.pdf]

## Supplemental Online Content

1  
2  
3  
4  
5  
6  
7  
8  
9  
10  
11  
12  
13  
14  
15  
16  
17  
18  
19  
20  
21  
22  
23  
24  
25  
26  
27  
28

Lowe DA, Wu N, Rohdin-Bibby L, et al. Effects of time-restricted eating on weight loss and other metabolic parameters in women and men with overweight and obesity: the TREAT randomized clinical trial. *JAMA Intern Med*. Published online September 28, 2020. doi:10.1001/jamainternmed.2020.4153

### **eMethods and eReferences**

**eFigure 1.** Estimated energy intake and energy expenditure derived from at-home weight measurements in total cohort

**eFigure 2.** Weight change in in-person cohort

**eFigure 3.** Bland-Altman plot for in-person weights and at-home weights using the iHealth Bluetooth scale

**eFigure 4.** Correlation of change in step count and change in TEE

**eTable 1.** Insulin and glucose homeostasis and cardiometabolic health measurements in in-person subjects

**eTable 2.** All body composition and strength measures

**eTable 3.** Other blood markers in in-person cohort

**eTable 4.** MOCACARE at home blood pressure measurements in total cohort

**eTable 5.** Self-reported sleep measures

**eTable 6.** Sleep and activity measures from Oura ring in in-person cohort

This supplemental material has been provided by the authors to give readers additional information about their work.

30 **EXPERIMENTAL MODEL AND SUBJECT DETAILS**

31 Participants were recruited through targeted email campaigns, Facebook ads, and fliers to join a weight loss study  
 32 investigating the effects of meal timing on weight loss. Subject eligibility was determined using an online eligibility survey  
 33 using the inclusion and exclusion criteria listed below, and all eligible subjects completed an online consent form via the  
 34 Eureka Research Platform.

## 35 Changes to Eligibility Criteria

36 Original inclusion criterion was BMI between 30 and 40 kg/m<sup>2</sup> and subjects who have tried more than 1 structured diet within  
 37 6 months of recruitment were excluded. BMI requirement was expanded and structured diet limit was dropped to increase  
 38 study enrollment.

## 39 Randomization

40 Participants were self-enrolled upon completion of eligibility survey if all inclusion criteria were met. Interventions were  
 41 assigned programmatically using the Ruby program. The Ruby program was written to create a schedule of strata and blocks  
 42 based on gender, age, and BMI. The shuffle function was used to make blocks random. The schedule was filtered according  
 43 to stratifiers from the eligibility survey and the next open slot in the schedule was assigned to a participant. Block  
 44 randomization was used with random block sizes of 2 and 4 with equal distribution between study groups. Randomization  
 45 schedule was generated on the backend servers of Eureka; the schedule was only visible to the programmer staff, and the  
 46 sequence was concealed from the clinical staff.

## 47 Sample Size Calculation

48 An initial power analysis showed that with a standard deviation (SD) of 9 kg in measured weight, and conservatively assuming  
 49 an intraclass correlation (ICC) of 0.8 between the baseline and follow-up weights, the clinical sample of 50 participants would  
 50 provide 80% power in 2-sided 5% tests to detect a between-group difference in weight change of 5.0 kg.

51 In addition, before the data analysis was undertaken, we estimated the minimum detectable effects in the planned analyses  
 52 using linear mixed models (LMMs) for daily weights measured at home by the virtual participants, without using the data.  
 53 Specifically, we estimated that with gradual attrition of 20% of the sample by the end of the trial, 81 of 90 expected daily  
 54 measurements per patient would on average be available. Then under the original assumption of an SD of 9 kg, and  
 55 considering ICCs between 0.8 and 0.95, we estimated that a sample of 100 virtual participants would provide 80% power in  
 56 2-sided 5% tests to detect between-group differences in weight change of .44 to .89 kg; in the observed sample of 116,  
 57 corresponding estimates are 0.41 to 0.82 kg. In the clinical data, with single pre- and post-measurements, corresponding  
 58 estimates under the same assumptions were 2.5 to 5.0 kg.

| Inclusion Criteria                                       | Exclusion Criteria                                             |
|----------------------------------------------------------|----------------------------------------------------------------|
| Male or female ages 18-64                                | Current or past cancer diagnosis                               |
| BMI between 27kg/m <sup>2</sup> and 43 kg/m <sup>2</sup> | Pregnancy, breastfeeding, or planned pregnancy within 6 months |
| Regularly consume breakfast (≥5 days/week)               | Current diagnosis of type 1 or type 2 Diabetes Mellitus        |
| Willing and able to skip breakfast                       | Currently taking glucose-lowering drugs or weight loss pills   |
| Speak, read, comprehend English                          | History of gastric bypass surgery or any weight loss surgery   |
| Access to reliable internet and/or Wi-Fi                 | >15% weight fluctuation in past 5 years                        |
| Have valid email address and phone number                | History of anorexia or bulimia                                 |
|                                                          | Frequent travel across time zones or unusual work hours        |
|                                                          | Unable to fast for prolonged periods                           |

59

## 60 Calculated Energy Intake and Energy Expenditure Estimates

61 At-home weight measurements from the total cohort were used in a linear mathematical model of body weight dynamics  
62 to estimate energy intake and energy expenditure as described by Guo et al.<sup>1,2</sup>. A 20-day interval was used to reduce  
63 variability in the model's estimated means of energy intake and energy expenditure.

## 64 Blood Pressure Measurements

65 A subset of the total cohort received a MOCACARE MOCACuff blood pressure cuff (Item model number 5031101001) to use  
66 at home. Participants were instructed to use the blood pressure cuff daily in the morning. Participants were instructed to  
67 email their data to the study team upon completion of the study.

## 68 Subjective Sleep and Food Attitudes Analyses

69 Participants' sleep and food attitudes data were analyzed through the self-reported Pittsburgh Sleep Quality Index (PSQI)  
70 and Rewards-Based Eating Drive (RED) Scale, respectively. PSQI and RED Scale surveys were sent to the participants  
71 through the study app.

## 72 In-person Metabolic Testing

73 Participants who lived within 60 miles of UCSF were eligible to undergo extensive in-person metabolic testing at the UCSF  
74 Clinical Research Center and the UCSF Body Composition Laboratory if they had no barriers to performing the tests (able to  
75 stand unassisted for several minutes, able to lie down for 30 minutes, no internal metal artifacts). In-person study activities  
76 were partly funded through the Shape Up! Adults study at the UHCC (NCT03637855). Participants who opted into the in-  
77 person testing group completed measurements detailed by Ng et al.<sup>3</sup>. 50 participants opted into the in-person testing, and  
78 46 participants completed all four in-person visits.

79 All four study visits began between 8:00-10:30 am, and subjects were instructed to fast starting at 8:00 pm the night before  
80 the study visit. The first study visit occurred ~1 week before the start of the participant's eating plan. During this visit,  
81 participants began their doubly-labelled water (DLW) TEE measurement<sup>4-8</sup>. ~1 week later at visit 2, participants came into  
82 the clinic fasted to complete their baseline DLW TEE measurement. Additionally, participants provided blood samples,  
83 underwent RMR measurements, DXA scans<sup>9</sup>, manual anthropometrics, and muscle function testing<sup>3</sup> (detailed methodology  
84 for metabolic testing can be found in the online supplemental methods). The participant's eating plan began the day after  
85 visit 2. Visit 3 occurred ~1 week prior to the end of the study. During visit 3, participants began their follow-up DLW TEE  
86 measurement. Visit 4 occurred on the last day of the study. At visit 4, participants completed their follow-up DLW TEE  
87 measurement, provided blood samples, and underwent RMR measurements, DXA scans, manual anthropometrics, and  
88 muscle function testing. Participants who used an iPhone were eligible to receive an Oura ring (Oura, Oulu, Finland) to track  
89 activity and sleep habits. Participants were compensated with a \$50 Visa gift card for each completed study visit.

## 90 Blood Measurements

91 At visit 2 and visit 4, a whole blood fasting sample of 40 ml was collected from each participant via venipuncture. All  
92 participants began fasting at 8:00pm the night before their blood draw, so duration of fasting for blood measures was  
93 matched between groups. Blood samples were placed on ice and processed within 4 hours into plasma, serum, whole blood,  
94 and buffy coat components and stored at -80°C at each study site until analysis. Biochemical analyses of all lipid and blood  
95 chemistry profiles were performed at Pennington Biomedical Research Center (PBRC). Serum chemistry panels were assayed  
96 through the use of a DXC600 instrument (Beckman Coulter, Inc.; Brea, CA). Insulin was measured by immunoassay on an  
97 Immulite 2000 platform (Siemens Corporation; Washington, DC). Additionally, EDTA plasma was used for targeted  
98 metabolomic analysis.

## 99 Total Energy Expenditure (TEE) Measurements

100 Baseline TEE analysis measured TEE for approximately 7 days prior to the study start. Subjects reported to the clinic after an  
101 overnight fast. A pre-dose urine specimen was collected and transfer to a 5 mL tube with an elastic o-ring seal. Subjects  
102 consumed a weighed dose of doubly labeled water containing, on average, 1.8 g/kg and 0.12 g/kg total body water of 10AP  
103 18O water and 99.9 AP 2H water, respectively <sup>8</sup>. The container was washed with 50 mL and subjects drank that as well.  
104 Subjects voided at 2 hours after the dose and that specimen was discarded. Two additional specimens were collected at 3  
105 and 4 hours after the dose, and aliquots were transferred to separate 5 mL o-ring sealed tubes. Urine specimens were stored  
106 frozen at -20°C then sent in Styrofoam boxes cooled with frozen gel packets to the University of Wisconsin. Subjects fasted  
107 throughout the entire specimen collection period and were provided 250 mL water between dosing and three hours post-  
108 dose. The volumes of water between the dose and 3 hours were recorded and subtracted from the total body water. Subjects  
109 returned to the clinic ~7 days later after an overnight fast. Urine was collected at the beginning and end of the study visit (~2  
110 hours apart) and aliquots were transferred to separate 5mL o-ring sealed tubes. Subjects fasted and abstained from fluid  
111 intake during the duration of this study visit. Follow-up TEE measurements were collected during the last ~7 days of the study  
112 using the same protocol described above.

113 Specimens were refrozen until analyzed. As detailed by Thorsen et al <sup>7</sup>, specimens were thawed and decolorized with 200  
114 mg of dry carbon black. Specimens were passed through a syringe mounted 45-micron filter to remove carbon black and any  
115 other solids. Aliquots of 1 mL each were placed in an autoinjector vial and a 15mL septum topped tube for isotopic analysis.  
116 The 15mL tube was flushed with 0.4% CO<sub>2</sub> in helium and 18O isotopic analyses performed on a Delta V Isotope Ratio Mass  
117 Spectrometer equipped with a Gas Bench inlet (ThermoFisher). The other aliquot was analyzed for 2H on a Delta Plus  
118 equipped with a HD Device using chromium reduction (ThermoFisher). Calibrated natural abundance and enriched working  
119 standards were analyzed along with each batch and results expressed on the SMOW scale. Precisions for 18O and 2H were  
120 0.15 and 1 o/oo, respectively.

121 The rate of CO<sub>2</sub> production was calculated using equation A6 <sup>6</sup> as modified by Racette et al. <sup>5</sup>. Total daily energy was  
122 calculated from rCO<sub>2</sub> assuming a respiratory ratio of 0.86 using the Weir equation <sup>4</sup>. Precision is 5% <sup>8</sup>.

### 123 Resting Metabolic Rate and Respiratory Quotient Measurements

124 Resting metabolic rate measurements (RMR) and respiratory quotient (RQ) measurements were collected using the PARVO  
125 Medics TrueOne 2400 Metabolic Cart (PARVO Medics, Salt Lake City, UT, USA) using the manufacturer's instructions. Briefly,  
126 fasted subjects rest for 10 minutes prior to start of experiment. Canopy is placed over participant's head, and dilution pump  
127 flow rate is adjusted so that CO<sub>2</sub> dilution is between 1-2%. Measurements are recorded for 30 minutes. The first 5 minutes  
128 of measurements were omitted. Once steady state was achieved (coefficient of variance <10% for VO<sub>2</sub> and VCO<sub>2</sub>), 5 minutes  
129 of data was collected and averaged to produce RQ and RMR values.

### 130 Dual-Energy X-Ray Absorptiometry (DXA) Analysis

131 DXA measures were collected using an adaptation from the protocol described by Ng at al. <sup>9</sup>. In the current study, two whole-  
132 body DXA scans were performed with repositioning using a Hologic Horizon/A system (Hologic Inc., Marlborough, MA, USA)  
133 and the results averaged. Participants were scanned according to the manufacturer's guidelines. All DXA scans were analyzed  
134 at UHCC by a single certified technologist using Hologic Apex 5.5 software. Lean mass was calculated by subtracting bone  
135 mineral content (BMC) from fat-free mass (FFM). Appendicular lean mass was calculated by adding the lean mass of both  
136 arms and legs. Trunk lean mass was calculated by subtracting the BMC of the spine, pelvis, and ribs from trunk FFM.

### 137 Manual Anthropometrics

138 Anthropometric measures of waist circumference (WC) and hip circumference (HC) were collected using a flexible measuring  
139 tape according to the standard protocol from National Health and Nutrition Examination Survey (NHANES) (Centers for  
140 Disease Control and Prevention. National Health and Nutrition Examination Survey (NHANES): Anthropometry Procedures  
141 Manual, 2007. Version current 30 October 2018. Internet:  
142 <https://wwwn.cdc.gov/nchs/nhanes/continuousnhanes/manuals.aspx?BeginYear=2017> (accessed 18 August 2019).).

143 Measurements were recorded in triplicate to the nearest 0.1 cm and results averaged. If a measurement differed by greater  
144 than 1 cm, a fourth measurement was taken and the closest three measurements averaged.

#### 145 Muscle Function Testing

146 Muscle function testing was adapted from the protocol described by Ng et al (22). Isokinetic and isometric right leg strength  
147 were measured using a Biodex System 4 (Biodex Medical Systems Inc) dynamometer. For isometric measurements, the  
148 dynamometer was fixed at 60° from full extension. For the isokinetic measurement, resistance was set at 60°/s. Peak torque  
149 was recorded as the maximum torque achieved during the repetitions. Hand grip strength for the right and left arms was  
150 measured with a handgrip dynamometer (JAMAR 5030J1). Participants positioned their elbow at a 90° angle and were asked  
151 to squeeze the dynamometer as hard as they could. The strength of each hand was measured in kilograms, and the average  
152 of the 3 measurements was recorded.

#### 153 Oura Ring Analysis

154 Only participants who used an iPhone were eligible to receive an Oura ring (Oura, Oulu, Finland). Participants were fitted  
155 with an Oura ring to wear on any finger. Participants were instructed to wear the ring during day and night and remove the  
156 ring only for charging and activities that would require removal of the ring.

#### 157 Statistical Analysis

158 Secondary outcomes included differences in weight loss, body fat, lean mass, fasting glucose, insulin, HbA1c levels, RMR, and  
159 TEE, assessed at baseline and 12-weeks in the in-person cohort. To estimate the intention to treat effect of treatment  
160 assignment on changes in these outcomes, we used LMMs with fixed effects for treatment assignment, an indicator for the  
161 12-week visit, and their interaction, and a random effect for participant. The treatment effect was estimated by the  
162 interaction. In sensitivity analyses, we repeated these analyses Winsorizing any outliers, defined as in the primary analysis.  
163 P-values and confidence intervals were Bonferroni-corrected for 8 comparisons.

164 All other outcomes measured at the baseline and 12-week clinical visits were considered exploratory and analyzed using the  
165 methods described for the secondary outcomes, without penalization for multiple comparisons. Data are presented as mean  
166 (95% confidence intervals) unless otherwise noted.

#### 167 Supplemental References 168

169

- 170 1. Guo J, Robinson JL, Gardner CD, Hall KD. Objective versus Self-Reported Energy Intake Changes During  
171 Low-Carbohydrate and Low-Fat Diets. *Obesity (Silver Spring)*. 2019;27(3):420-426.
- 172 2. Sanghvi A, Redman LM, Martin CK, Ravussin E, Hall KD. Validation of an inexpensive and accurate  
173 mathematical method to measure long-term changes in free-living energy intake. *Am J Clin Nutr*.  
174 2015;102(2):353-358.
- 175 3. Ng BK, Sommer MJ, Wong MC, et al. Detailed 3-dimensional body shape features predict body  
176 composition, blood metabolites, and functional strength: the Shape Up! studies. *Am J Clin Nutr*.  
177 2019;110(6):1316-1326.
- 178 4. Weir JB. New methods for calculating metabolic rate with special reference to protein metabolism. *J*  
179 *Physiol*. 1949;109(1-2):1-9.
- 180 5. Racette SB, Schoeller DA, Luke AH, Shay K, Hnilicka J, Kushner RF. Relative dilution spaces of 2H- and  
181 18O-labeled water in humans. *Am J Physiol*. 1994;267(4 Pt 1):E585-590.
- 182 6. Schoeller DA, Ravussin E, Schutz Y, Acheson KJ, Baertschi P, Jequier E. Energy expenditure by doubly  
183 labeled water: validation in humans and proposed calculation. *Am J Physiol*. 1986;250(5 Pt 2):R823-830.

- 184 7. Thorsen T, Shriver T, Racine N, Richman BA, Schoeller DA. Doubly labeled water analysis using cavity  
185 ring-down spectroscopy. *Rapid Commun Mass Spectrom*. 2011;25(1):3-8.
- 186 8. Trabulsi J, Troiano RP, Subar AF, et al. Precision of the doubly labeled water method in a large-scale  
187 application: evaluation of a streamlined-dosing protocol in the Observing Protein and Energy Nutrition  
188 (OPEN) study. *Eur J Clin Nutr*. 2003;57(11):1370-1377.
- 189 9. Ng BK, Hinton BJ, Fan B, Kanaya AM, Shepherd JA. Clinical anthropometrics and body composition from  
190 3D whole-body surface scans. *Eur J Clin Nutr*. 2016;70(11):1265-1270.

191

192

193 eFigure 1. Estimated energy intake and energy expenditure derived from at-home weight measurements in total cohort.

194 A.

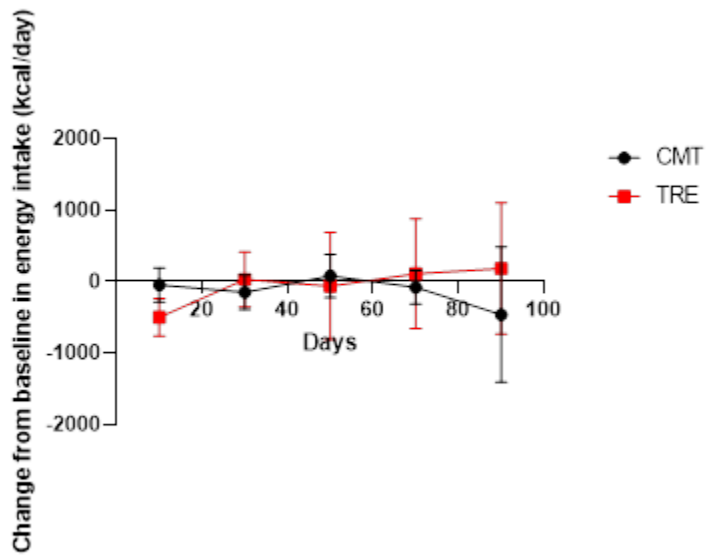

195 B.

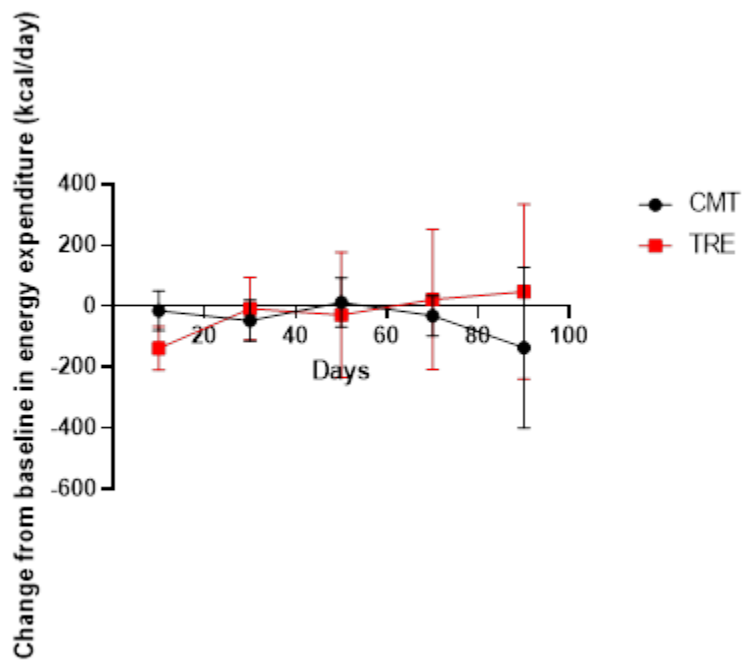

196  
197 Estimated changes from baseline in energy intake (A) and energy expenditure (B).

198

199

200 eFigure2. Weight change in in-person cohort.

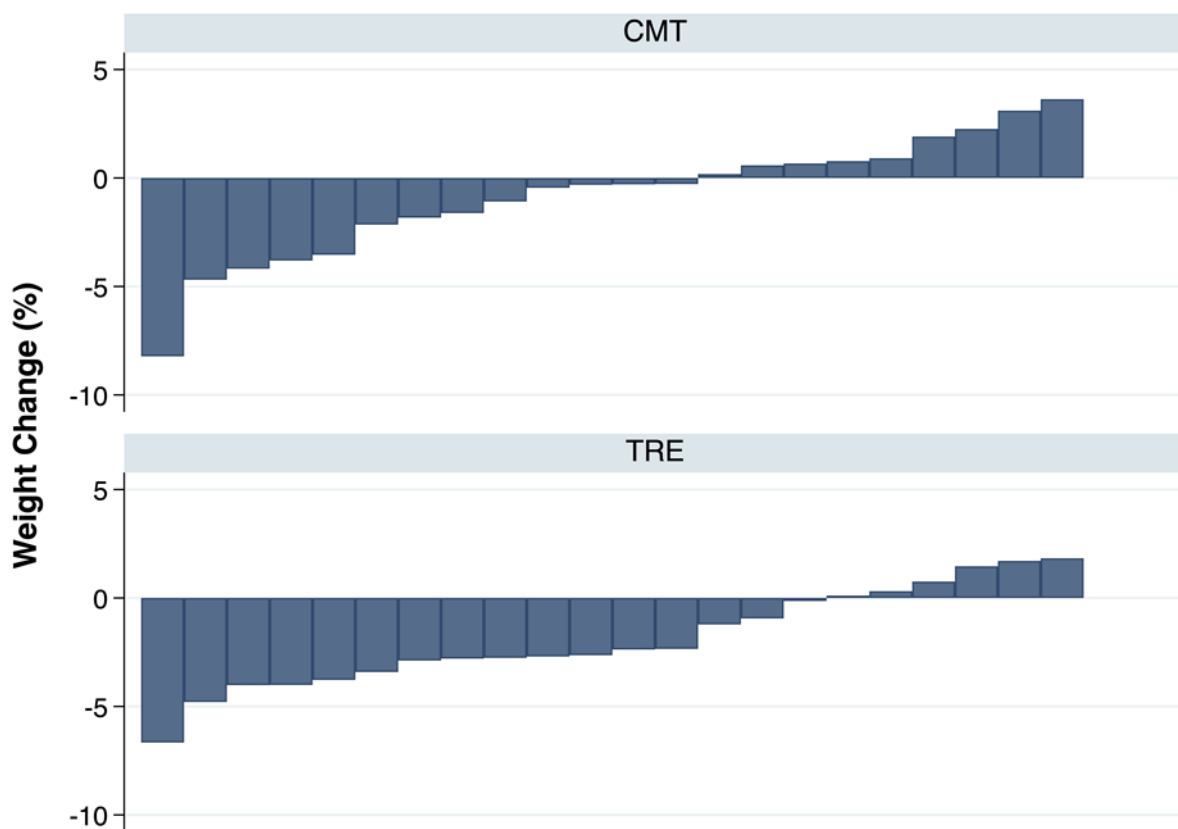

201

202 Waterfall plot showing percent weight change for each participant from the in-person cohort in the CMT group (top) and  
203 TRE group (bottom).

204

205



206 eFigure 3. Bland-Altman plot for in-person weights and at-home weights using the iHealth Bluetooth scale.

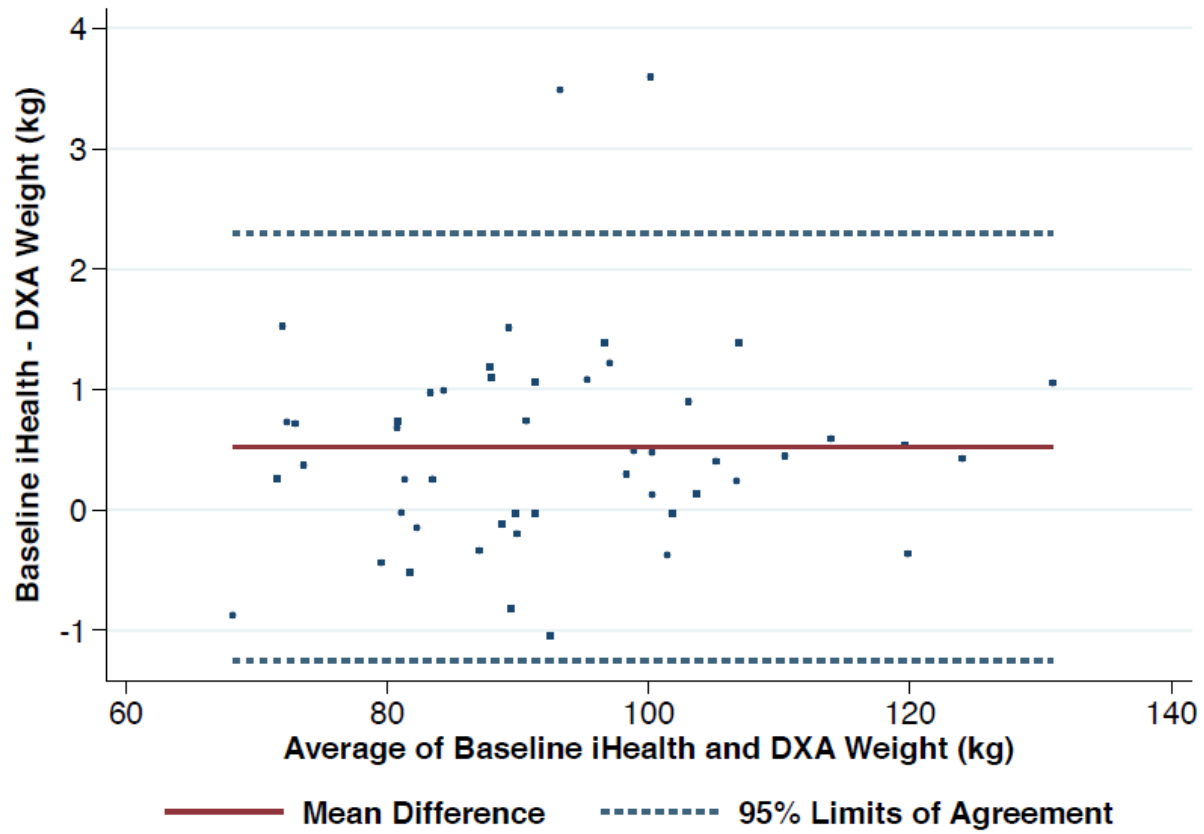

207

208

209

210 eFigure 4. Correlation of change in step count and change in TEE.

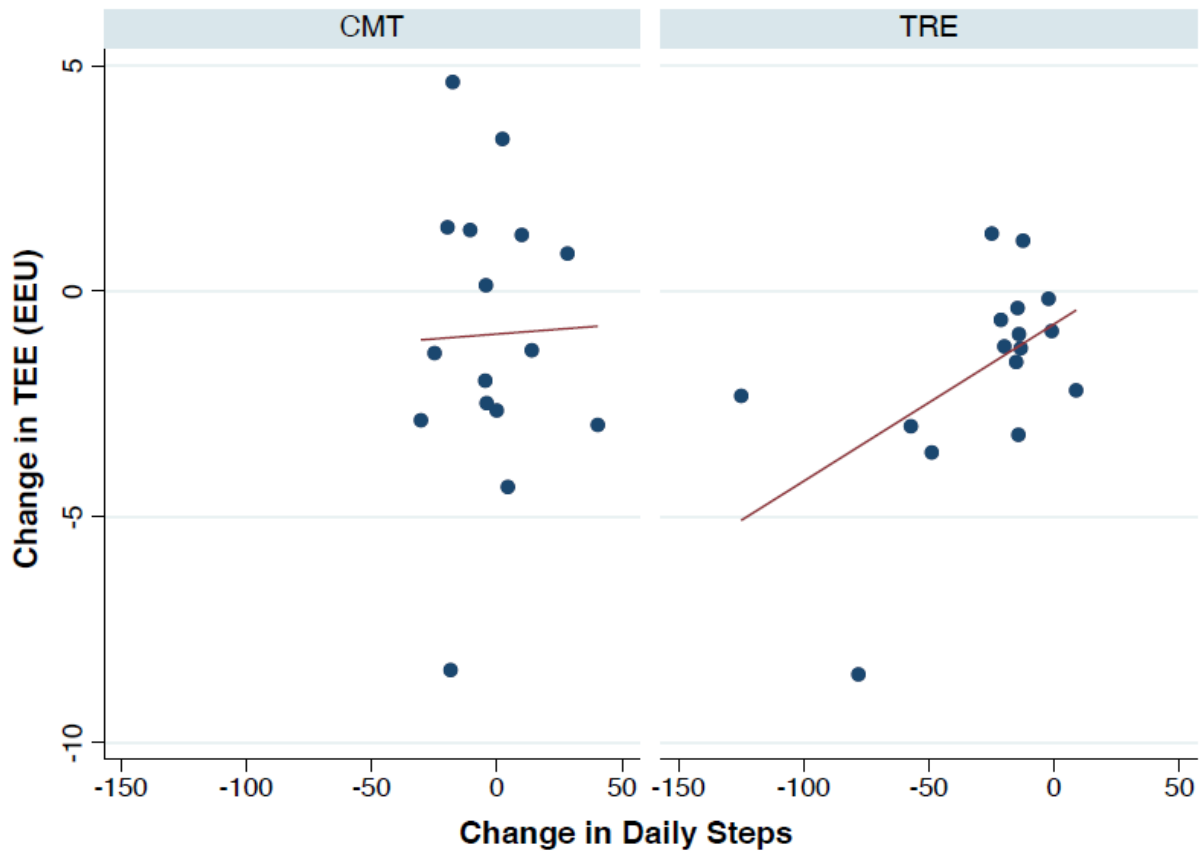

211

212 The correlation of change in step count versus change in TEE was stronger in the TRE group (0.52) than the CMT group  
213 (0.03); however, the equality of correlations was not significant ( $p=0.48$ ).

214

eTable 1. Insulin and glucose homeostasis and cardiometabolic health measurements in in-person subjects.

|                                            | CMT Pre<br>(n=25)          | CMT Post<br>(n=24)         | ΔCMT                          | ΔCMT <i>p</i><br>value   | TRE Pre<br>(n=25)          | TRE Post<br>(n=22)         | ΔTRE                          | ΔTRE <i>p</i><br>value   | Difference<br>between groups | <i>p</i> value |
|--------------------------------------------|----------------------------|----------------------------|-------------------------------|--------------------------|----------------------------|----------------------------|-------------------------------|--------------------------|------------------------------|----------------|
| <b>Glucose (mg/dL) <sup>a</sup></b>        | 93.9<br>(90.3,<br>97.5)    | 94.2<br>(90.5,<br>97.8)    | 0.29 (-<br>2.41,<br>3.00)     | <b>0.83</b>              | 91.7<br>(88.1,<br>95.3)    | 90.6<br>(86.9,<br>94.3)    | -1.06 (-<br>3.87,<br>1.75)    | <b>0.46</b>              | -1.35 (-5.25, 2.54)          | <b>0.50</b>    |
| <b>Insulin (mU/L) <sup>a</sup></b>         | 14.7<br>(11.3,<br>18.0)    | 14.8<br>(11.5,<br>18.2)    | 0.19 (-<br>1.58,<br>1.96)     | <b>0.83</b>              | 12.4 (9.0,<br>15.7)        | 11.9 (8.5,<br>15.3)        | -0.50 (-<br>2.34,<br>1.35)    | <b>0.60</b>              | -0.69 (-3.25, 1.86)          | <b>0.60</b>    |
| <b>HbA1C (%)<sup>a</sup></b>               | 5.30<br>(5.16,<br>5.44)    | 5.29<br>(5.16,<br>5.43)    | -0.006 (-<br>0.057,<br>0.044) | <b>0.81</b>              | 5.28<br>(5.14,<br>5.41)    | 5.25<br>(5.12,<br>5.39)    | -0.024 (-<br>0.077,<br>0.029) | <b>0.37</b>              | -0.018 (-0.120,<br>0.084)    | <b>0.63</b>    |
| <b>HOMA-IR</b>                             | 3.41<br>(2.62,<br>4.21)    | 3.50<br>(2.70,<br>4.30)    | 0.085 (-<br>0.328,<br>0.498)  | <b>0.69</b>              | 2.81<br>(2.02,<br>3.61)    | 2.65<br>(1.85,<br>3.46)    | -0.160 (-<br>0.590,<br>0.270) | <b>0.47</b>              | -0.245 (-0.841,<br>0.351)    | <b>0.42</b>    |
| <b>Systolic Blood Pressure<br/>(mmHg)</b>  | 122.6<br>(119.0,<br>126.2) | 118.7<br>(115.1,<br>122.4) | -3.86 (-<br>7.58, -<br>0.14)  | <b>0.042<sup>b</sup></b> | 119.8<br>(116.2,<br>123.5) | 118.1<br>(114.3,<br>122.0) | -1.69 (-<br>5.54,<br>2.15)    | <b>0.39</b>              | 2.17 (-3.18, 7.52)           | <b>0.43</b>    |
| <b>Diastolic Blood Pressure<br/>(mmHg)</b> | 74.6<br>(70.9,<br>78.4)    | 71.6<br>(67.8,<br>75.4)    | -3.01 (-<br>6.90,<br>0.89)    | <b>0.13</b>              | 76.9<br>(73.2,<br>80.7)    | 72.8<br>(68.9,<br>76.8)    | -4.08 (-<br>8.11, -<br>0.06)  | <b>0.047<sup>b</sup></b> | -1.08 (-6.67, 4.52)          | <b>0.71</b>    |
| <b>Total Cholesterol<br/>(mg/dL)</b>       | 202.5<br>(187.9,<br>217.1) | 203.5<br>(188.7,<br>218.2) | 0.97 (-<br>8.60,<br>10.55)    | <b>0.84</b>              | 203.7<br>(189.1,<br>218.3) | 200.1<br>(185.1,<br>215.1) | -3.56 (-<br>13.52,<br>6.40)   | <b>0.48</b>              | -4.53 (-18.34,<br>9.29)      | <b>0.52</b>    |
| <b>HDL (mg/dL)</b>                         | 50.1<br>(44.8,<br>55.5)    | 50.7<br>(45.4,<br>56.1)    | 0.61 (-<br>1.72,<br>2.94)     | <b>0.61</b>              | 54.7<br>(49.4,<br>60.1)    | 54.0<br>(48.6,<br>59.4)    | -0.72 (-<br>3.16,<br>1.71)    | <b>0.56</b>              | -1.33 (-4.70, 2.04)          | <b>0.44</b>    |
| <b>LDL (mg/dL)</b>                         | 126.4<br>(114.9,<br>138.0) | 124.2<br>(112.6,<br>135.7) | -2.24 (-<br>10.14,<br>5.66)   | <b>0.58</b>              | 122.1<br>(110.7,<br>133.6) | 122.7<br>(111.0,<br>134.5) | 0.60 (-<br>7.46,<br>8.66)     | <b>0.88</b>              | 2.84 (-8.45, 14.13)          | <b>0.62</b>    |
| <b>Triglycerides (mg/dL)</b>               | 133.4<br>(108.3,<br>158.4) | 136.0<br>(110.8,<br>161.3) | 2.67 (-<br>13.88,<br>19.21)   | <b>0.75</b>              | 127.2<br>(102.1,<br>152.2) | 116.9<br>(91.2,<br>142.6)  | -10.27 (-<br>27.48,<br>6.94)  | <b>0.24</b>              | -12.94 (-36.81,<br>10.93)    | <b>0.29</b>    |

All data are presented as means (95% confidence interval). For secondary outcome measures, Bonferroni-corrected confidence intervals are presented and Bonferroni-adjusted critical alpha of 0.006 is used. For data with statistical outliers, winsorised data was used to generate *p* value.

HbA1C, hemoglobin A1C; HOMA-IR, homeostatic model assessment of insulin resistance HDL, high-density lipoprotein; LDL, low-density lipoprotein.

<sup>a</sup>secondary outcome using a Bonferroni-corrected alpha of 0.006 and presenting 99.7% CI for between group differences

<sup>b</sup>within-group  $p$  value less than 0.05

eTable 2. All body composition and strength measures.

|                                   | CMT Pre<br>(n=25)                | CMT Post<br>(n=24)               | ΔCMT                            | ΔCMT <i>p</i><br>value | TRE Pre<br>(n=25)                | TRE Post<br>(n=22)               | ΔTRE                               | ΔTRE <i>p</i><br>value | Difference<br>between groups  | <i>p</i> value      |
|-----------------------------------|----------------------------------|----------------------------------|---------------------------------|------------------------|----------------------------------|----------------------------------|------------------------------------|------------------------|-------------------------------|---------------------|
| <b>DXA Analysis</b>               |                                  |                                  |                                 |                        |                                  |                                  |                                    |                        |                               |                     |
| <b>Android Fat (g)</b>            | 2890.0<br>(2541.1,<br>3238.9)    | 2908.1<br>(2558.7,<br>3257.6)    | 18.13 (-<br>75.61,<br>111.87)   | <b>0.70</b>            | 2731.6<br>(2382.7,<br>3080.6)    | 2650.3<br>(2299.7,<br>3000.8)    | -81.40 (-<br>179.24,<br>16.44)     | <b>0.10</b>            | -99.52 (-235.02,<br>35.97)    | <b>0.15</b>         |
| <b>Android Lean (g)</b>           | 4885.0<br>(4498.7,<br>5271.3)    | 4825.4<br>(4438.6,<br>5212.2)    | -59.60 (-<br>158.27,<br>39.07)  | <b>0.24</b>            | 4819.2<br>(4432.9,<br>5205.5)    | 4717.1<br>(4329.2,<br>5105.1)    | -102.02 (-<br>205.02,<br>0.97)     | <b>0.052</b>           | -42.43 (-185.06,<br>100.21)   | <b>0.56</b>         |
| <b>Android Mass (g)</b>           | 7784.7<br>(7137.1,<br>8432.4)    | 7750.4<br>(7102.0,<br>8398.7)    | -34.35 (-<br>185.89,<br>117.18) | <b>0.66</b>            | 7542.0<br>(6894.3,<br>8189.6)    | 7384.8<br>(6734.9,<br>8034.8)    | -157.17 (-<br>315.36,<br>1.03)     | <b>0.052</b>           | -122.81 (-341.88,<br>96.25)   | <b>0.27</b>         |
| <b>Android Percent Fat (%)</b>    | 37.0<br>(34.4,<br>39.5)          | 37.1<br>(34.6,<br>39.6)          | 0.14 (-<br>0.60,<br>0.87)       | <b>0.71</b>            | 35.7 (33.1,<br>38.2)             | 35.4<br>(32.8,<br>37.9)          | -0.27 (-<br>1.04, 0.50)            | <b>0.49</b>            | -0.41 (-1.47,<br>0.66)        | <b>0.45</b>         |
| <b>Gynoid Fat (g)</b>             | 4933.5<br>(4468.7,<br>5398.2)    | 4887.8<br>(4422.6,<br>5353.1)    | -45.62 (-<br>151.24,<br>60.01)  | <b>0.40</b>            | 4749.3<br>(4284.5,<br>5214.1)    | 4602.2<br>(4135.9,<br>5068.6)    | -147.06 (-<br>257.33, -<br>36.79)  | <b>0.009**</b>         | -101.44 (-254.14,<br>51.25)   | <b>0.19</b>         |
| <b>Gynoid Lean (g)</b>            | 10000.1<br>(9286.4,<br>10713.8)  | 10032.4<br>(9318.2,<br>10746.6)  | 32.30 (-<br>98.59,<br>163.18)   | <b>0.63</b>            | 10046.1<br>(9332.4,<br>10759.8)  | 9707.5<br>(8992.2,<br>10422.7)   | -338.65 (-<br>475.31, -<br>201.99) | <b>&lt;0.001***</b>    | -370.95 (-560.18,<br>-181.72) | <b>&lt;0.001###</b> |
| <b>Gynoid Mass (g)</b>            | 14940.8<br>(14124.2,<br>15757.4) | 14929.2<br>(14111.9,<br>15746.6) | -11.56 (-<br>193.42,<br>170.30) | <b>0.90</b>            | 14801.1<br>(13984.6,<br>15617.7) | 14308.4<br>(13489.2,<br>15127.6) | -492.70 (-<br>682.55, -<br>302.84) | <b>&lt;0.001***</b>    | -481.14 (-744.04,<br>-218.24) | <b>&lt;0.001###</b> |
| <b>Gynoid Percent Fat (g)</b>     | 33.0<br>(30.2,<br>35.8)          | 32.7<br>(29.9,<br>35.5)          | -0.32 (-<br>0.84,<br>0.21)      | <b>0.24</b>            | 32.4 (29.6,<br>35.2)             | 32.5<br>(29.7,<br>35.3)          | 0.06 (-0.49,<br>0.61)              | <b>0.82</b>            | 0.38 (-0.38, 1.14)            | <b>0.33</b>         |
| <b>Visceral Fat Body Fat (g)</b>  | 1590.5<br>(1402.7,<br>1778.4)    | 1593.9<br>(1405.8,<br>1782.0)    | 3.42 (-<br>46.09,<br>52.92)     | <b>0.89</b>            | 1484.1<br>(1296.3,<br>1672.0)    | 1456.1<br>(1267.5,<br>1644.8)    | -27.98 (-<br>79.64,<br>23.69)      | <b>0.29</b>            | -31.39 (-102.95,<br>40.16)    | <b>0.39</b>         |
| <b>Visceral Fat Body Lean (g)</b> | 2450.1<br>(2280.6,<br>2619.6)    | 2397.4<br>(2227.7,<br>2567.0)    | -52.76 (-<br>91.26, -<br>14.26) | <b>0.007**</b>         | 2451.6<br>(2282.1,<br>2621.1)    | 2399.5<br>(2229.5,<br>2569.5)    | -52.08 (-<br>92.27, -<br>11.89)    | <b>0.011*</b>          | 0.68 (-54.97,<br>56.34)       | <b>0.98</b>         |
| <b>Visceral Fat Body Mass (g)</b> | 4042.2<br>(3730.3,<br>4354.0)    | 3992.3<br>(3680.2,<br>4304.4)    | -49.81 (-<br>116.36,<br>16.74)  | <b>0.14</b>            | 3929.1<br>(3617.3,<br>4240.9)    | 3858.5<br>(3545.8,<br>4171.2)    | -70.62 (-<br>140.09, -<br>1.14)    | <b>0.046*</b>          | -20.81 (-117.01,<br>75.40)    | <b>0.67</b>         |

|                                                       |                               |                               |                                |               |                               |                               |                                 |               |                           |             |
|-------------------------------------------------------|-------------------------------|-------------------------------|--------------------------------|---------------|-------------------------------|-------------------------------|---------------------------------|---------------|---------------------------|-------------|
| <b>Visceral Fat<br/>Body Percent Fat (%)</b>          | 39.0<br>(36.5,<br>41.4)       | 39.2<br>(36.7,<br>41.6)       | 0.21 (-<br>0.56,<br>0.99)      | <b>0.59</b>   | 37.1 (34.7,<br>39.6)          | 36.9<br>(34.5,<br>39.4)       | -0.21 (-<br>1.02, 0.60)         | <b>0.62</b>   | -0.42 (-1.54,<br>0.70)    | <b>0.46</b> |
| <b>Visceral Fat<br/>Outerwall Fat (g)</b>             | 1215.6<br>(1075.4,<br>1355.9) | 1218.9<br>(1078.5,<br>1359.4) | 3.34 (-<br>34.59,<br>41.27)    | <b>0.86</b>   | 1141.7<br>(1001.5,<br>1282.0) | 1124.0<br>(983.1,<br>1264.9)  | -17.70 (-<br>57.29,<br>21.90)   | <b>0.38</b>   | -21.04 (-75.87,<br>33.80) | <b>0.45</b> |
| <b>Visceral Fat<br/>Outerwall Lean (g)</b>            | 2268.6<br>(2107.7,<br>2429.4) | 2222.8<br>(2061.8,<br>2383.7) | -45.81 (-<br>82.05, -<br>9.57) | <b>0.013*</b> | 2283.5<br>(2122.6,<br>2444.3) | 2234.5<br>(2073.2,<br>2395.9) | -48.91 (-<br>86.74, -<br>11.08) | <b>0.011*</b> | -3.10 (-55.49,<br>49.28)  | <b>0.91</b> |
| <b>Visceral Fat<br/>Outerwall Mass (g)</b>            | 3491.3<br>(3221.5,<br>3761.2) | 3452.5<br>(3182.4,<br>3722.5) | -38.84 (-<br>92.03,<br>14.35)  | <b>0.15</b>   | 3423.6<br>(3153.8,<br>3693.5) | 3363.3<br>(3092.8,<br>3633.8) | -60.34 (-<br>115.87, -<br>4.81) | <b>0.033*</b> | -21.50 (-98.39,<br>55.40) | <b>0.58</b> |
| <b>Visceral Fat<br/>Outerwall<br/>Percent Fat (%)</b> | 34.6<br>(32.4,<br>36.9)       | 34.9<br>(32.7,<br>37.2)       | 0.27 (-<br>0.48,<br>1.03)      | <b>0.48</b>   | 32.9 (30.7,<br>35.1)          | 32.8<br>(30.5,<br>35.0)       | -0.15 (-<br>0.93, 0.64)         | <b>0.72</b>   | -0.42 (-1.51,<br>0.67)    | <b>0.45</b> |
| <b>Visceral Fat<br/>Cavity Fat (g)</b>                | 1015.3<br>(885.1,<br>1145.4)  | 1015.5<br>(885.2,<br>1145.8)  | 0.20 (-<br>35.42,<br>35.82)    | <b>0.99</b>   | 943.6<br>(813.5,<br>1073.8)   | 933.6<br>(802.9,<br>1064.4)   | -10.00 (-<br>47.18,<br>27.18)   | <b>0.60</b>   | -10.20 (-61.69,<br>41.30) | <b>0.70</b> |
| <b>Visceral Fat<br/>Cavity Lean (g)</b>               | 2037.0<br>(1885.8,<br>2188.2) | 1993.1<br>(1841.8,<br>2144.5) | -43.88 (-<br>84.52, -<br>3.23) | <b>0.034*</b> | 2056.4<br>(1905.2,<br>2207.6) | 2010.3<br>(1858.4,<br>2162.1) | -46.15 (-<br>88.58, -<br>3.73)  | <b>0.033*</b> | -2.28 (-61.03,<br>56.48)  | <b>0.94</b> |
| <b>Visceral Fat<br/>Cavity Mass (g)</b>               | 3053.8<br>(2804.7,<br>3302.9) | 3000.0<br>(2750.6,<br>3249.4) | -53.76 (-<br>110.44,<br>2.93)  | <b>0.06</b>   | 2999.2<br>(2750.1,<br>3248.3) | 2943.4<br>(2693.5,<br>3193.3) | -55.83 (-<br>115.00,<br>3.35)   | <b>0.06</b>   | -2.07 (-84.01,<br>79.87)  | <b>0.96</b> |
| <b>Visceral Fat<br/>Cavity Percent<br/>Fat (%)</b>    | 32.9<br>(30.5,<br>35.2)       | 33.0<br>(30.7,<br>35.4)       | 0.19 (-<br>0.59,<br>0.98)      | <b>0.63</b>   | 30.9 (28.5,<br>33.2)          | 30.8<br>(28.5,<br>33.2)       | -0.05 (-<br>0.87, 0.77)         | <b>0.90</b>   | -0.25 (-1.38,<br>0.89)    | <b>0.67</b> |
| <b>Visceral Fat Area<br/>(cm<sup>2</sup>)</b>         | 129.6<br>(109.6,<br>149.5)    | 131.4<br>(111.4,<br>151.4)    | 1.83 (-<br>3.89,<br>7.56)      | <b>0.53</b>   | 120.1<br>(100.1,<br>140.0)    | 119.5<br>(99.5,<br>139.6)     | -0.53 (-<br>6.51, 5.45)         | <b>0.86</b>   | -2.36 (-10.64,<br>5.91)   | <b>0.58</b> |
| <b>Visceral Fat<br/>Mass (g)</b>                      | 624.8<br>(528.6,<br>720.9)    | 633.6<br>(537.3,<br>729.9)    | 8.84 (-<br>18.77,<br>36.45)    | <b>0.53</b>   | 578.9<br>(482.7,<br>675.0)    | 576.3<br>(479.7,<br>673.0)    | -2.55 (-<br>31.37,<br>26.26)    | <b>0.86</b>   | -11.39 (-51.30,<br>28.52) | <b>0.58</b> |
| <b>Visceral Fat<br/>Volume (cm<sup>3</sup>)</b>       | 675.4<br>(571.5,<br>779.4)    | 685.0<br>(580.9,<br>789.1)    | 9.55 (-<br>20.30,<br>39.40)    | <b>0.53</b>   | 625.8<br>(521.9,<br>729.8)    | 623.1<br>(518.6,<br>727.5)    | -2.76 (-<br>33.91,<br>28.39)    | <b>0.86</b>   | -12.31 (-55.46,<br>30.83) | <b>0.58</b> |

|                                    |                               |                               |                               |             |                               |                               |                                |             |                            |             |
|------------------------------------|-------------------------------|-------------------------------|-------------------------------|-------------|-------------------------------|-------------------------------|--------------------------------|-------------|----------------------------|-------------|
| <b>TAT Area (cm<sup>2</sup>)</b>   | 534.9<br>(477.0,<br>592.9)    | 534.1<br>(476.1,<br>592.1)    | -0.81 (-<br>14.44,<br>12.81)  | <b>0.91</b> | 508.9<br>(451.0,<br>566.8)    | 500.5<br>(442.4,<br>558.7)    | -8.38 (-<br>22.61,<br>5.84)    | <b>0.25</b> | -7.57 (-27.27,<br>12.12)   | <b>0.45</b> |
| <b>TAT Mass (g)</b>                | 2579.1<br>(2299.8,<br>2858.4) | 2575.2<br>(2295.6,<br>2854.8) | -3.92 (-<br>69.60,<br>61.77)  | <b>0.91</b> | 2453.6<br>(2174.3,<br>2732.9) | 2413.2<br>(2132.9,<br>2693.5) | -40.43 (-<br>108.99,<br>28.14) | <b>0.25</b> | -36.51 (-131.46,<br>58.44) | <b>0.45</b> |
| <b>TAT Volume (cm<sup>3</sup>)</b> | 2788.2<br>(2486.3,<br>3090.1) | 2784.0<br>(2481.7,<br>3086.2) | -4.23 (-<br>75.24,<br>66.77)  | <b>0.91</b> | 2652.6<br>(2350.6,<br>2954.5) | 2608.9<br>(2305.8,<br>2911.9) | -43.70 (-<br>117.83,<br>30.42) | <b>0.25</b> | -39.47 (-142.12,<br>63.18) | <b>0.45</b> |
| <b>Sat Area (cm<sup>2</sup>)</b>   | 405.4<br>(360.1,<br>450.6)    | 402.7<br>(357.4,<br>447.9)    | -2.69 (-<br>13.60,<br>8.22)   | <b>0.63</b> | 388.8<br>(343.6,<br>434.1)    | 380.9<br>(335.5,<br>426.3)    | -7.94 (-<br>19.34,<br>3.45)    | <b>0.17</b> | -5.25 (-21.03,<br>10.52)   | <b>0.51</b> |
| <b>Subcutaneous Fat Mass (g)</b>   | 1954.3<br>(1736.4,<br>2172.3) | 1941.4<br>(1723.1,<br>2159.6) | -12.97 (-<br>65.59,<br>39.65) | <b>0.63</b> | 1874.7<br>(1656.8,<br>2092.7) | 1836.4<br>(1617.6,<br>2055.2) | -38.30 (-<br>93.23,<br>16.62)  | <b>0.17</b> | -25.34 (-101.40,<br>50.73) | <b>0.51</b> |
| <b>Sat Volume (cm<sup>3</sup>)</b> | 2112.8<br>(1877.1,<br>2348.4) | 2098.8<br>(1862.9,<br>2334.7) | -14.02 (-<br>70.91,<br>42.87) | <b>0.63</b> | 2026.7<br>(1791.1,<br>2262.4) | 1985.3<br>(1748.8,<br>2221.9) | -41.41 (-<br>100.79,<br>17.97) | <b>0.17</b> | -27.39 (-109.62,<br>54.84) | <b>0.51</b> |
| <b>Waist Circumference (cm)</b>    | 110.7<br>(106.7,<br>114.8)    | 110.2<br>(106.1,<br>114.2)    | -0.55 (-<br>1.62,<br>0.51)    | <b>0.31</b> | 109.7<br>(105.6,<br>113.7)    | 108.7<br>(104.6,<br>112.7)    | -1.04 (-<br>2.15, 0.07)        | <b>0.07</b> | -0.49 (-2.03,<br>1.05)     | <b>0.53</b> |
| <b>Subcu Fat Correction</b>        | 224.0<br>(190.2,<br>257.8)    | 222.6<br>(188.7,<br>256.4)    | -1.46 (-<br>11.23,<br>8.32)   | <b>0.77</b> | 208.8<br>(175.0,<br>242.6)    | 204.6<br>(170.6,<br>238.6)    | -4.19 (-<br>14.39,<br>6.01)    | <b>0.42</b> | -2.74 (-16.86,<br>11.39)   | <b>0.70</b> |
| <b>Body Width</b>                  | 178.6<br>(172.6,<br>184.6)    | 178.1<br>(172.0,<br>184.1)    | -0.50 (-<br>2.39,<br>1.38)    | <b>0.60</b> | 175.0<br>(169.0,<br>181.0)    | 174.9<br>(168.8,<br>180.9)    | -0.17 (-<br>2.14, 1.80)        | <b>0.87</b> | 0.34 (-2.39, 3.06)         | <b>0.81</b> |
| <b>Outer Wall Width</b>            | 131.1<br>(126.8,<br>135.4)    | 131.8<br>(127.5,<br>136.1)    | 0.72 (-<br>0.30,<br>1.74)     | <b>0.17</b> | 130.8<br>(126.5,<br>135.1)    | 130.6<br>(126.3,<br>134.9)    | -0.18 (-<br>1.25, 0.89)        | <b>0.74</b> | -0.90 (-2.38,<br>0.58)     | <b>0.23</b> |
| <b>Cavity Width</b>                | 110.5<br>(105.7,<br>115.3)    | 110.7<br>(105.9,<br>115.6)    | 0.27 (-<br>1.44,<br>1.98)     | <b>0.76</b> | 110.3<br>(105.5,<br>115.1)    | 110.3<br>(105.5,<br>115.1)    | 0.03 (-1.76,<br>1.81)          | <b>0.98</b> | -0.24 (-2.71,<br>2.23)     | <b>0.85</b> |
| <b>Total Percent Fat</b>           | 33.0<br>(30.4,<br>35.7)       | 32.9<br>(30.3,<br>35.6)       | -0.07 (-<br>0.55,<br>0.42)    | <b>0.78</b> | 32.9 (30.3,<br>35.6)          | 32.8<br>(30.2,<br>35.5)       | -0.09 (-<br>0.59, 0.42)        | <b>0.74</b> | -0.02 (-0.72,<br>0.68)     | <b>0.96</b> |

|                                                        |                                  |                                  |                                 |               |                                  |                                  |                                      |                     |                                |                |
|--------------------------------------------------------|----------------------------------|----------------------------------|---------------------------------|---------------|----------------------------------|----------------------------------|--------------------------------------|---------------------|--------------------------------|----------------|
| <b>Body Mass Index</b>                                 | 31.3<br>(29.8,<br>32.7)          | 31.1<br>(29.7,<br>32.6)          | -0.18 (-<br>0.46,<br>0.10)      | <b>0.20</b>   | 31.4 (30.0,<br>32.9)             | 30.9<br>(29.4,<br>32.3)          | -0.52 (-<br>0.81, -0.22)             | <b>&lt;0.001***</b> | -0.33 (-0.74,<br>0.07)         | <b>0.11</b>    |
| <b>Android Gynoid Ratio</b>                            | 1.14<br>(1.07,<br>1.20)          | 1.15<br>(1.09,<br>1.22)          | 0.016<br>(0.000,<br>0.032)      | <b>0.047*</b> | 1.12 (1.06,<br>1.19)             | 1.11<br>(1.05,<br>1.18)          | -0.010 (-<br>0.027,<br>0.006)        | <b>0.23</b>         | -0.027 (-0.050, -<br>0.003)    | <b>0.025#</b>  |
| <b>Android Percent Fat</b>                             | 37.0<br>(34.4,<br>39.5)          | 37.1<br>(34.6,<br>39.6)          | 0.14 (-<br>0.60,<br>0.87)       | <b>0.71</b>   | 35.7 (33.1,<br>38.2)             | 35.4<br>(32.8,<br>37.9)          | -0.27 (-<br>1.04, 0.50)              | <b>0.49</b>         | -0.41 (-1.47,<br>0.66)         | <b>0.45</b>    |
| <b>Gynoid Percent Fat</b>                              | 33.0<br>(30.2,<br>35.8)          | 32.7<br>(29.9,<br>35.5)          | -0.32 (-<br>0.84,<br>0.21)      | <b>0.24</b>   | 32.4 (29.6,<br>35.2)             | 32.5<br>(29.7,<br>35.3)          | 0.06 (-0.49,<br>0.61)                | <b>0.82</b>         | 0.38 (-0.38, 1.14)             | <b>0.33</b>    |
| <b>Fat Mass Ratio</b>                                  | 0.992<br>(0.939,<br>1.046)       | 1.001<br>(0.947,<br>1.054)       | 0.0087 (-<br>0.0031,<br>0.0205) | <b>0.15</b>   | 1.012<br>(0.959,<br>1.066)       | 1.000<br>(0.947,<br>1.054)       | -0.0120 (-<br>0.0243,<br>0.0004)     | <b>0.06</b>         | -0.0207 (-0.0378,<br>-0.0036)  | <b>0.018#</b>  |
| <b>Trunk Limb Fat Mass Ratio</b>                       | 1.13<br>(1.05,<br>1.21)          | 1.14<br>(1.06,<br>1.23)          | 0.011 (-<br>0.007,<br>0.030)    | <b>0.23</b>   | 1.14 (1.05,<br>1.22)             | 1.13<br>(1.04,<br>1.21)          | -0.009 (-<br>0.028,<br>0.010)        | <b>0.37</b>         | -0.020 (-0.047,<br>0.006)      | <b>0.14</b>    |
| <b>Fat Mass Height Squared (kg/m<sup>2</sup>)</b>      | 10.4 (9.3,<br>11.6)              | 10.4 (9.2,<br>11.6)              | -0.03 (-<br>0.24,<br>0.18)      | <b>0.79</b>   | 10.5 (9.3,<br>11.6)              | 10.3 (9.2,<br>11.5)              | -0.18 (-<br>0.40, 0.04)              | <b>0.11</b>         | -0.15 (-0.46,<br>0.16)         | <b>0.34</b>    |
| <b>Total Fat Mass (g)</b>                              | 30671.7<br>(27676.2,<br>33667.2) | 30643.6<br>(27645.5,<br>33641.7) | -28.10 (-<br>658.75,<br>602.55) | <b>0.93</b>   | 30336.3<br>(27340.9,<br>33331.8) | 29829.5<br>(26825.4,<br>32833.5) | -506.89 (-<br>1165.31,<br>151.52)    | <b>0.13</b>         | -478.80 (-<br>1390.52, 432.92) | <b>0.30</b>    |
| <b>Lean Mass Height Squared (kg/m<sup>2</sup>)</b>     | 20.9<br>(19.8,<br>21.9)          | 20.7<br>(19.7,<br>21.8)          | -0.11 (-<br>0.30,<br>0.07)      | <b>0.22</b>   | 21.1 (20.1,<br>22.2)             | 20.7<br>(19.7,<br>21.8)          | -0.40 (-<br>0.59, -0.21)             | <b>&lt;0.001***</b> | -0.28 (-0.55, -<br>0.02)       | <b>0.036#</b>  |
| <b>Appendicular Lean Mass Index (kg/m<sup>2</sup>)</b> | 9.07<br>(8.53,<br>9.61)          | 9.02<br>(8.48,<br>9.55)          | -0.057 (-<br>0.135,<br>0.021)   | <b>0.15</b>   | 9.26 (8.72,<br>9.79)             | 9.04<br>(8.50,<br>9.58)          | -0.218 (-<br>0.299, -<br>0.137)      | <b>&lt;0.001***</b> | -0.161 (-0.274, -<br>0.048)    | <b>0.005##</b> |
| <b>Total Lean Mass (g)</b>                             | 62232.5<br>(57729.5,<br>66735.5) | 61887.3<br>(57382.7,<br>66391.9) | -345.24<br>(-943.82,<br>253.34) | <b>0.26</b>   | 62539.2<br>(58036.2,<br>67042.2) | 61447.8<br>(56939.6,<br>65956.0) | -1091.44 (-<br>1716.53, -<br>466.35) | <b>&lt;0.001***</b> | -746.20 (-<br>1611.67, 119.26) | <b>0.09#</b>   |
| <b>Pure Lean Height Squared (kg/m<sup>2</sup>)</b>     | 20.0<br>(19.0,<br>21.0)          | 19.9<br>(18.9,<br>20.9)          | -0.12 (-<br>0.30,<br>0.07)      | <b>0.22</b>   | 20.3 (19.3,<br>21.3)             | 19.9<br>(18.9,<br>20.9)          | -0.40 (-<br>0.59, -0.21)             | <b>&lt;0.001***</b> | -0.29 (-0.55, -<br>0.02)       | <b>0.035#</b>  |



|                                                             |                               |                               |                           |             |                               |                               |                              |                     |                            |                |
|-------------------------------------------------------------|-------------------------------|-------------------------------|---------------------------|-------------|-------------------------------|-------------------------------|------------------------------|---------------------|----------------------------|----------------|
| <b>Appendicular Pure Lean Mass Index (kg/m<sup>2</sup>)</b> | 8.62<br>(8.10, 9.14)          | 8.56<br>(8.04, 9.08)          | -0.058 (-0.136, 0.020)    | <b>0.14</b> | 8.80 (8.28, 9.32)             | 8.58<br>(8.06, 9.10)          | -0.220 (-0.301, -0.139)      | <b>&lt;0.001***</b> | -0.162 (-0.274, -0.050)    | <b>0.005##</b> |
| <b>Pure Lean Mass (kg/m<sup>2</sup>)</b>                    | 59694.0<br>(55302.7, 64085.4) | 59344.1<br>(54951.1, 63737.0) | -349.98 (-948.39, 248.43) | <b>0.25</b> | 60027.9<br>(55636.6, 64419.3) | 58924.3<br>(54527.6, 63320.9) | -1103.65 (-1728.55, -478.74) | <b>&lt;0.001***</b> | -753.67 (-1618.88, 111.55) | <b>0.09</b>    |
| <b>Scan Analysis BMI</b>                                    | 31.3<br>(29.8, 32.7)          | 31.1<br>(29.7, 32.6)          | -0.18 (-0.46, 0.10)       | <b>0.20</b> | 31.4 (30.0, 32.9)             | 30.9<br>(29.4, 32.3)          | -0.52 (-0.81, -0.22)         | <b>&lt;0.001***</b> | -0.33 (-0.74, 0.07)        | <b>0.11</b>    |
| <b>Whole Body Total Area (cm<sup>2</sup>)</b>               | 2240.4<br>(2153.7, 2327.1)    | 2246.1<br>(2159.4, 2332.9)    | 5.68 (-4.56, 15.93)       | <b>0.28</b> | 2227.8<br>(2141.0, 2314.5)    | 2229.8<br>(2143.0, 2316.6)    | 2.08 (-8.62, 12.78)          | <b>0.70</b>         | -3.60 (-18.42, 11.21)      | <b>0.63</b>    |
| <b>Bone Mineral Content (g)</b>                             | 2541.9<br>(2388.3, 2695.5)    | 2546.9<br>(2393.3, 2700.5)    | 5.00 (-8.33, 18.33)       | <b>0.46</b> | 2511.3<br>(2357.7, 2664.9)    | 2523.2<br>(2369.6, 2676.9)    | 11.95 (-1.97, 25.87)         | <b>0.09</b>         | 6.95 (-12.32, 26.23)       | <b>0.48</b>    |
| <b>Whole Body Total BMD (g/cm<sup>2</sup>)</b>              | 1.13<br>(1.10, 1.16)          | 1.13<br>(1.10, 1.16)          | -0.001 (-0.005, 0.004)    | <b>0.83</b> | 1.12 (1.09, 1.16)             | 1.13<br>(1.09, 1.16)          | 0.004 (-0.001, 0.009)        | <b>0.10</b>         | 0.005 (-0.002, 0.011)      | <b>0.18</b>    |
| <b>Subtot Area (cm<sup>2</sup>)</b>                         | 2006.6<br>(1923.0, 2090.2)    | 2012.7<br>(1929.1, 2096.3)    | 6.05 (-4.22, 16.31)       | <b>0.25</b> | 1995.7<br>(1912.2, 2079.3)    | 1995.2<br>(1911.6, 2078.9)    | -0.53 (-11.25, 10.18)        | <b>0.92</b>         | -6.58 (-21.42, 8.26)       | <b>0.38</b>    |
| <b>Subtot BMC (g)</b>                                       | 2024.0<br>(1883.0, 2164.9)    | 2030.5<br>(1889.6, 2171.4)    | 6.56 (-4.82, 17.93)       | <b>0.26</b> | 2007.0<br>(1866.1, 2147.9)    | 2014.7<br>(1873.7, 2155.7)    | 7.66 (-4.22, 19.54)          | <b>0.21</b>         | 1.10 (-15.34, 17.55)       | <b>0.90</b>    |
| <b>Subtot BMD (g/cm<sup>2</sup>)</b>                        | 1.00<br>(0.97, 1.04)          | 1.00<br>(0.97, 1.04)          | 0.000 (-0.004, 0.005)     | <b>0.88</b> | 1.00 (0.97, 1.03)             | 1.00<br>(0.97, 1.04)          | 0.004 (-0.001, 0.008)        | <b>0.10</b>         | 0.003 (-0.003, 0.010)      | <b>0.28</b>    |
| <b>Head Area (cm<sup>2</sup>)</b>                           | 233.8<br>(226.6, 241.1)       | 233.5<br>(226.2, 240.7)       | -0.34 (-2.36, 1.68)       | <b>0.74</b> | 232.0<br>(224.8, 239.3)       | 234.6<br>(227.3, 241.9)       | 2.61 (0.50, 4.72)            | <b>0.015*</b>       | 2.95 (0.03, 5.88)          | <b>0.047#</b>  |
| <b>Head BMC (g)</b>                                         | 514.5<br>(479.1, 549.9)       | 512.4<br>(477.0, 547.8)       | -2.07 (-7.08, 2.95)       | <b>0.42</b> | 504.2<br>(468.9, 539.6)       | 508.5<br>(473.1, 544.0)       | 4.27 (-0.97, 9.51)           | <b>0.11</b>         | 6.34 (-0.91, 13.59)        | <b>0.09</b>    |
| <b>Head BMD (g/cm<sup>2</sup>)</b>                          | 2.20<br>(2.07, 2.32)          | 2.19<br>(2.07, 2.31)          | -0.008 (-0.027, 0.012)    | <b>0.44</b> | 2.17 (2.05, 2.29)             | 2.16<br>(2.04, 2.29)          | -0.005 (-0.025, 0.015)       | <b>0.61</b>         | 0.002 (-0.025, 0.030)      | <b>0.86</b>    |

|                                         |                            |                            |                                 |                |                            |                            |                                  |             |                              |              |
|-----------------------------------------|----------------------------|----------------------------|---------------------------------|----------------|----------------------------|----------------------------|----------------------------------|-------------|------------------------------|--------------|
| <b>Left Arm Area (cm<sup>2</sup>)</b>   | 246.9<br>(234.0, 259.9)    | 247.2<br>(234.3, 260.1)    | 0.28 (-<br>2.27,<br>2.82)       | <b>0.83</b>    | 239.6<br>(226.7,<br>252.5) | 239.5<br>(226.5,<br>252.5) | -0.09 (-<br>2.75, 2.56)          | <b>0.95</b> | -0.37 (-4.05,<br>3.31)       | <b>0.84</b>  |
| <b>Left Arm BMC (g)</b>                 | 192.5<br>(176.4,<br>208.6) | 193.0<br>(176.9,<br>209.2) | 0.55 (-<br>1.13,<br>2.22)       | <b>0.52</b>    | 183.3<br>(167.2,<br>199.4) | 183.1<br>(166.9,<br>199.2) | -0.24 (-<br>1.99, 1.51)          | <b>0.79</b> | -0.79 (-3.21,<br>1.64)       | <b>0.53</b>  |
| <b>Left Arm BMD (g/cm<sup>2</sup>)</b>  | 0.771<br>(0.742,<br>0.800) | 0.772<br>(0.743,<br>0.801) | 0.0009 (-<br>0.0050,<br>0.0068) | <b>0.76</b>    | 0.757<br>(0.728,<br>0.786) | 0.757<br>(0.727,<br>0.786) | -0.0003 (-<br>0.0065,<br>0.0059) | <b>0.92</b> | -0.0012 (-0.0098,<br>0.0073) | <b>0.78</b>  |
| <b>Right Arm Area (cm<sup>2</sup>)</b>  | 254.2<br>(241.6,<br>266.9) | 252.6<br>(239.9,<br>265.3) | -1.63 (-<br>3.69,<br>0.42)      | <b>0.12</b>    | 247.0<br>(234.3,<br>259.6) | 246.5<br>(233.8,<br>259.2) | -0.45 (-<br>2.60, 1.69)          | <b>0.68</b> | 1.18 (-1.79, 4.15)           | <b>0.44</b>  |
| <b>Right Arm BMC (g)</b>                | 201.2<br>(184.9,<br>217.6) | 201.6<br>(185.2,<br>217.9) | 0.34 (-<br>0.85,<br>1.53)       | <b>0.58</b>    | 192.4<br>(176.1,<br>208.8) | 192.2<br>(175.9,<br>208.6) | -0.18 (-<br>1.42, 1.06)          | <b>0.78</b> | -0.52 (-2.24,<br>1.20)       | <b>0.55</b>  |
| <b>Right Arm BMD (g/cm<sup>2</sup>)</b> | 0.783<br>(0.752,<br>0.814) | 0.790<br>(0.759,<br>0.820) | 0.0067<br>(0.0024,<br>0.0110)   | <b>0.002**</b> | 0.772<br>(0.742,<br>0.803) | 0.773<br>(0.742,<br>0.804) | 0.0007 (-<br>0.0039,<br>0.0052)  | <b>0.78</b> | -0.0061 (-0.0123,<br>0.0002) | <b>0.06</b>  |
| <b>Left Rib Area (cm<sup>2</sup>)</b>   | 134.6<br>(128.6,<br>140.7) | 140.2<br>(134.1,<br>146.3) | 5.53<br>(1.12,<br>9.94)         | <b>0.014*</b>  | 140.8<br>(134.8,<br>146.8) | 141.5<br>(135.3,<br>147.8) | 0.76 (-3.82,<br>5.34)            | <b>0.74</b> | -4.77 (-11.13,<br>1.59)      | <b>0.14</b>  |
| <b>Left Rib BMC (g)</b>                 | 85.8<br>(80.2,<br>91.4)    | 89.7<br>(84.1,<br>95.4)    | 3.90<br>(1.12,<br>6.69)         | <b>0.006**</b> | 90.6 (85.0,<br>96.2)       | 90.5<br>(84.8,<br>96.2)    | -0.06 (-<br>2.96, 2.85)          | <b>0.97</b> | -3.96 (-7.99,<br>0.06)       | <b>0.054</b> |
| <b>Left Rib BMD (g/cm<sup>2</sup>)</b>  | 0.637<br>(0.610,<br>0.664) | 0.642<br>(0.615,<br>0.669) | 0.0048 (-<br>0.0086,<br>0.0181) | <b>0.48</b>    | 0.642<br>(0.615,<br>0.669) | 0.636<br>(0.609,<br>0.664) | -0.0060 (-<br>0.0199,<br>0.0079) | <b>0.40</b> | -0.0107 (-0.0300,<br>0.0085) | <b>0.27</b>  |
| <b>Right Rib Area (cm<sup>2</sup>)</b>  | 149.0<br>(141.1,<br>157.0) | 148.2<br>(140.1,<br>156.2) | -0.88 (-<br>5.61,<br>3.84)      | <b>0.71</b>    | 146.9<br>(138.9,<br>154.8) | 149.6<br>(141.4,<br>157.7) | 2.71 (-2.20,<br>7.63)            | <b>0.28</b> | 3.59 (-3.22,<br>10.41)       | <b>0.30</b>  |
| <b>Right Rib BMC (g)</b>                | 97.7<br>(90.7,<br>104.6)   | 96.5<br>(89.6,<br>103.5)   | -1.14 (-<br>4.69,<br>2.42)      | <b>0.53</b>    | 93.9 (87.0,<br>100.8)      | 95.4<br>(88.4,<br>102.5)   | 1.53 (-2.17,<br>5.24)            | <b>0.42</b> | 2.67 (-2.46, 7.80)           | <b>0.31</b>  |
| <b>Right Rib BMD (g/cm<sup>2</sup>)</b> | 0.657<br>(0.631,<br>0.682) | 0.652<br>(0.626,<br>0.677) | -0.0048<br>(-0.0179,<br>0.0084) | <b>0.48</b>    | 0.637<br>(0.611,<br>0.662) | 0.634<br>(0.608,<br>0.660) | -0.0031 (-<br>0.0168,<br>0.0106) | <b>0.66</b> | 0.0017 (-0.0173,<br>0.0206)  | <b>0.86</b>  |

|                                              |                         |                         |                                 |               |                         |                         |                                 |             |                             |                          |
|----------------------------------------------|-------------------------|-------------------------|---------------------------------|---------------|-------------------------|-------------------------|---------------------------------|-------------|-----------------------------|--------------------------|
| <b>Thoracic Spine Area (cm<sup>2</sup>)</b>  | 159.4<br>(152.0, 166.8) | 161.7<br>(154.3, 169.1) | 2.30 (-<br>2.76,<br>7.36)       | <b>0.37</b>   | 159.3<br>(151.9, 166.7) | 157.5<br>(149.9, 165.0) | -1.85 (-<br>7.11, 3.41)         | <b>0.49</b> | -4.15 (-11.45,<br>3.15)     | <b>0.27</b>              |
| <b>Thoracic Spine BMC (g)</b>                | 141.3<br>(131.1, 151.5) | 144.1<br>(133.9, 154.3) | 2.82 (-<br>1.32,<br>6.95)       | <b>0.18</b>   | 142.7<br>(132.5, 152.9) | 143.3<br>(133.0, 153.6) | 0.62 (-3.69,<br>4.94)           | <b>0.78</b> | -2.19 (-8.16,<br>3.78)      | <b>0.47</b>              |
| <b>Thoracic Spine BMD (g/cm<sup>2</sup>)</b> | 0.885<br>(0.848, 0.922) | 0.891<br>(0.854, 0.928) | 0.0064 (-<br>0.0090,<br>0.0218) | <b>0.42</b>   | 0.890<br>(0.853, 0.926) | 0.905<br>(0.867, 0.942) | 0.0149 (-<br>0.0012,<br>0.0310) | <b>0.07</b> | 0.0085 (-0.0138,<br>0.0308) | <b>0.46</b>              |
| <b>Lumbar Spine Area (cm<sup>2</sup>)</b>    | 58.5<br>(55.8, 61.2)    | 57.5<br>(54.7, 60.2)    | -1.06 (-<br>2.74,<br>0.62)      | <b>0.22</b>   | 58.5 (55.8,<br>61.2)    | 58.8<br>(56.0, 61.6)    | 0.31 (-1.44,<br>2.06)           | <b>0.73</b> | 1.37 (-1.06, 3.80)          | <b>0.27</b>              |
| <b>Lumbar Spine BMC (g)</b>                  | 60.4<br>(55.4, 65.3)    | 60.6<br>(55.6, 65.5)    | 0.22 (-<br>2.12,<br>2.56)       | <b>0.85</b>   | 61.8 (56.9,<br>66.7)    | 63.0<br>(58.0, 68.0)    | 1.25 (-1.19,<br>3.70)           | <b>0.31</b> | 1.03 (-2.35, 4.42)          | <b>0.55</b>              |
| <b>Lumbar Spine BMD (g/cm<sup>2</sup>)</b>   | 1.03<br>(0.97, 1.08)    | 1.05<br>(1.00, 1.10)    | 0.022<br>(0.002,<br>0.041)      | <b>0.028*</b> | 1.05 (1.00,<br>1.10)    | 1.06<br>(1.01, 1.11)    | 0.010 (-<br>0.010,<br>0.030)    | <b>0.33</b> | -0.012 (-0.040,<br>0.016)   | <b>0.42</b>              |
| <b>Pelvic Area (cm<sup>2</sup>)</b>          | 215.1<br>(201.1, 229.2) | 214.6<br>(200.6, 228.7) | -0.47 (-<br>4.89,<br>3.95)      | <b>0.83</b>   | 218.4<br>(204.4, 232.5) | 215.9<br>(201.8, 230.0) | -2.51 (-<br>7.12, 2.10)         | <b>0.29</b> | -2.04 (-8.42,<br>4.35)      | <b>0.53</b>              |
| <b>Pelvic BMC (g)</b>                        | 274.1<br>(249.7, 298.5) | 274.0<br>(249.5, 298.5) | -0.10 (-<br>6.31,<br>6.12)      | <b>0.98</b>   | 283.8<br>(259.3, 308.2) | 282.1<br>(257.6, 306.7) | -1.64 (-<br>8.13, 4.85)         | <b>0.62</b> | -1.54 (-10.53,<br>7.45)     | <b>0.74</b>              |
| <b>Pelvic BMD (g/cm<sup>2</sup>)</b>         | 1.26<br>(1.21, 1.32)    | 1.26<br>(1.21, 1.32)    | 0.000 (-<br>0.016,<br>0.016)    | <b>0.97</b>   | 1.29 (1.24,<br>1.35)    | 1.30<br>(1.25, 1.35)    | 0.007 (-<br>0.010,<br>0.023)    | <b>0.42</b> | 0.006 (-0.017,<br>0.030)    | <b>0.58</b>              |
| <b>Left Leg Area (cm<sup>2</sup>)</b>        | 394.5<br>(375.0, 414.0) | 396.6<br>(377.0, 416.1) | 2.07 (-<br>1.72,<br>5.86)       | <b>0.28</b>   | 393.4<br>(373.9, 412.9) | 393.5<br>(373.9, 413.0) | 0.09 (-3.87,<br>4.05)           | <b>0.96</b> | -1.98 (-7.46,<br>3.50)      | <b>0.48</b>              |
| <b>Left Leg BMC (g)</b>                      | 486.0<br>(448.6, 523.4) | 485.4<br>(448.0, 522.8) | -0.60 (-<br>5.15,<br>3.95)      | <b>0.80</b>   | 477.4<br>(439.9, 514.8) | 480.4<br>(442.9, 517.9) | 3.06 (-1.70,<br>7.81)           | <b>0.21</b> | 3.66 (-2.93,<br>10.24)      | <b>0.28</b>              |
| <b>Left Leg BMD (g/cm<sup>2</sup>)</b>       | 1.22<br>(1.17, 1.27)    | 1.21<br>(1.16, 1.26)    | -0.007 (-<br>0.014,<br>0.001)   | <b>0.07</b>   | 1.21 (1.16,<br>1.25)    | 1.21<br>(1.17, 1.26)    | 0.007 (-<br>0.001,<br>0.015)    | <b>0.07</b> | 0.014 (0.003,<br>0.025)     | <b>0.011<sup>#</sup></b> |

|                                         |                            |                            |                          |                |                            |                            |                          |                |                        |             |
|-----------------------------------------|----------------------------|----------------------------|--------------------------|----------------|----------------------------|----------------------------|--------------------------|----------------|------------------------|-------------|
| <b>Right Leg Area (cm<sup>2</sup>)</b>  | 394.1<br>(374.6, 413.6)    | 394.7<br>(375.2, 414.2)    | 0.64 (-3.33, 4.61)       | <b>0.75</b>    | 391.9<br>(372.4, 411.4)    | 391.0<br>(371.5, 410.6)    | -0.90 (-5.05, 3.24)      | <b>0.67</b>    | -1.54 (-7.28, 4.20)    | <b>0.60</b> |
| <b>Right Leg BMC (g)</b>                | 485.0<br>(447.9, 522.0)    | 486.0<br>(448.9, 523.1)    | 1.01 (-4.17, 6.19)       | <b>0.70</b>    | 481.2<br>(444.2, 518.3)    | 483.6<br>(446.5, 520.7)    | 2.37 (-3.04, 7.78)       | <b>0.39</b>    | 1.36 (-6.13, 8.85)     | <b>0.72</b> |
| <b>Right Leg BMD (g/cm<sup>2</sup>)</b> | 1.22<br>(1.17, 1.26)       | 1.22<br>(1.17, 1.27)       | 0.003 (-0.009, 0.015)    | <b>0.62</b>    | 1.22 (1.17, 1.27)          | 1.23<br>(1.18, 1.28)       | 0.008 (-0.004, 0.020)    | <b>0.19</b>    | 0.005 (-0.012, 0.022)  | <b>0.55</b> |
| <b>Head Fat (g)</b>                     | 1277.0<br>(1215.9, 1338.2) | 1265.4<br>(1204.2, 1326.6) | -11.63 (-25.45, 2.18)    | <b>0.10</b>    | 1266.4<br>(1205.3, 1327.6) | 1265.7<br>(1204.4, 1327.1) | -0.70 (-15.13, 13.72)    | <b>0.92</b>    | 10.93 (-9.04, 30.90)   | <b>0.28</b> |
| <b>Head Lean (g)</b>                    | 3960.5<br>(3783.2, 4137.9) | 3931.4<br>(3753.9, 4108.9) | -29.16 (-66.84, 8.52)    | <b>0.13</b>    | 3945.4<br>(3768.0, 4122.7) | 3954.3<br>(3776.4, 4132.1) | 8.90 (-30.44, 48.23)     | <b>0.66</b>    | 38.05 (-16.42, 92.52)  | <b>0.17</b> |
| <b>Head Mass (g)</b>                    | 5237.6<br>(4999.9, 5475.3) | 5196.8<br>(4958.9, 5434.7) | -40.78 (-92.19, 10.62)   | <b>0.12</b>    | 5212.1<br>(4974.4, 5449.8) | 5222.5<br>(4984.1, 5461.0) | 10.41 (-43.25, 64.08)    | <b>0.70</b>    | 51.20 (-23.12, 125.51) | <b>0.18</b> |
| <b>Head Percent Fat (%)</b>             | 24.4<br>(24.1, 24.6)       | 24.3<br>(24.1, 24.6)       | -0.03 (-0.09, 0.03)      | <b>0.39</b>    | 24.4 (24.1, 24.6)          | 24.4<br>(24.1, 24.6)       | -0.02 (-0.09, 0.04)      | <b>0.52</b>    | 0.01 (-0.08, 0.09)     | <b>0.90</b> |
| <b>Left Arm Fat (g)</b>                 | 1781.3<br>(1585.2, 1977.4) | 1769.1<br>(1572.8, 1965.4) | -12.26 (-59.46, 34.93)   | <b>0.61</b>    | 1797.6<br>(1601.5, 1993.7) | 1787.3<br>(1590.5, 1984.1) | -10.26 (-59.52, 39.01)   | <b>0.68</b>    | 2.01 (-66.22, 70.23)   | <b>0.95</b> |
| <b>Left Arm Lean (g)</b>                | 3555.9<br>(3178.7, 3933.1) | 3489.8<br>(3112.5, 3867.1) | -66.09 (-114.21, -17.98) | <b>0.007**</b> | 3463.7<br>(3086.5, 3840.9) | 3386.0<br>(3008.4, 3763.6) | -77.66 (-127.91, -27.41) | <b>0.002**</b> | -11.57 (-81.14, 58.00) | <b>0.74</b> |
| <b>Left Arm Mass (g)</b>                | 5337.2<br>(4969.4, 5705.0) | 5259.8<br>(4891.7, 5627.9) | -77.37 (-153.42, -1.32)  | <b>0.046*</b>  | 5192.8<br>(4825.0, 5560.5) | 5118.3<br>(4749.5, 5487.1) | -74.45 (-153.85, 4.95)   | <b>0.07</b>    | 2.92 (-107.02, 112.87) | <b>0.96</b> |
| <b>Left Arm Percent Fat (%)</b>         | 33.7<br>(30.0, 37.5)       | 34.0<br>(30.2, 37.7)       | 0.23 (-0.37, 0.83)       | <b>0.46</b>    | 35.4 (31.6, 39.1)          | 35.6<br>(31.8, 39.3)       | 0.20 (-0.43, 0.83)       | <b>0.53</b>    | -0.02 (-0.89, 0.84)    | <b>0.96</b> |
| <b>Right Arm Fat (g)</b>                | 1834.9<br>(1638.1, 2031.7) | 1830.7<br>(1633.7, 2027.7) | -4.22 (-47.46, 39.02)    | <b>0.85</b>    | 1882.8<br>(1686.0, 2079.6) | 1864.7<br>(1667.3, 2062.1) | -18.17 (-63.31, 26.98)   | <b>0.43</b>    | -13.95 (-76.46, 48.56) | <b>0.66</b> |

|                                  |                               |                               |                           |             |                               |                               |                             |                     |                           |                          |
|----------------------------------|-------------------------------|-------------------------------|---------------------------|-------------|-------------------------------|-------------------------------|-----------------------------|---------------------|---------------------------|--------------------------|
| <b>Right Arm Lean (g)</b>        | 3632.8<br>(3246.0, 4019.6)    | 3616.0<br>(3229.1, 4003.0)    | -16.77 (-60.38, 26.85)    | <b>0.45</b> | 3649.3<br>(3262.5, 4036.2)    | 3558.7<br>(3171.5, 3945.8)    | -90.66 (-136.21, -45.11)    | <b>&lt;0.001***</b> | -73.89 (-136.95, -10.83)  | <b>0.022<sup>#</sup></b> |
| <b>Right Arm Mass (g)</b>        | 5467.7<br>(5090.9, 5844.4)    | 5447.6<br>(5070.6, 5824.5)    | -20.14 (-86.85, 46.58)    | <b>0.55</b> | 5480.2<br>(5103.4, 5856.9)    | 5374.7<br>(4997.2, 5752.2)    | -105.48 (-175.14, -35.82)   | <b>0.003**</b>      | -85.34 (-181.80, 11.11)   | <b>0.08</b>              |
| <b>Right Arm Percent Fat (%)</b> | 34.0<br>(30.3, 37.7)          | 34.0<br>(30.3, 37.7)          | -0.08 (-0.65, 0.49)       | <b>0.80</b> | 35.2 (31.4, 38.9)             | 35.4<br>(31.7, 39.2)          | 0.29 (-0.30, 0.89)          | <b>0.34</b>         | 0.37 (-0.46, 1.19)        | <b>0.38</b>              |
| <b>Trunk Fat (g)</b>             | 15490.8<br>(13776.9, 17204.6) | 15591.7<br>(13876.1, 17307.2) | 100.91 (-282.95, 484.78)  | <b>0.61</b> | 15312.0<br>(13598.1, 17025.8) | 15018.9<br>(13299.6, 16738.3) | -293.02 (-693.76, 107.72)   | <b>0.15</b>         | -393.93 (-948.86, 160.99) | <b>0.16</b>              |
| <b>Trunk Lean (g)</b>            | 31137.2<br>(28948.4, 33326.0) | 30992.8<br>(28802.6, 33183.0) | -144.36 (-537.84, 249.13) | <b>0.47</b> | 31110.1<br>(28921.3, 33298.9) | 30641.1<br>(28447.7, 32834.5) | -469.07 (-879.92, -58.21)   | <b>0.025*</b>       | -324.71 (-893.59, 244.17) | <b>0.26</b>              |
| <b>Trunk Mass (g)</b>            | 46627.9<br>(43496.2, 49759.7) | 46587.2<br>(43453.6, 49720.9) | -40.70 (-585.80, 504.39)  | <b>0.88</b> | 46452.1<br>(43320.3, 49583.8) | 45658.3<br>(42520.4, 48796.2) | -793.73 (-1362.90, -224.56) | <b>0.006**</b>      | -753.03 (-1541.11, 35.06) | <b>0.06</b>              |
| <b>Trunk Percent Fat (%)</b>     | 33.1<br>(30.5, 35.7)          | 33.1<br>(30.5, 35.7)          | 0.00 (-0.60, 0.60)        | <b>0.99</b> | 32.9 (30.4, 35.5)             | 32.7<br>(30.1, 35.3)          | -0.25 (-0.88, 0.37)         | <b>0.43</b>         | -0.26 (-1.12, 0.61)       | <b>0.56</b>              |
| <b>Left Leg Fat (g)</b>          | 5061.1<br>(4506.4, 5615.7)    | 4991.9<br>(4436.9, 5547.0)    | -69.16 (-173.97, 35.65)   | <b>0.20</b> | 4930.7<br>(4376.1, 5485.4)    | 4862.3<br>(4306.4, 5418.3)    | -68.43 (-177.86, 41.01)     | <b>0.22</b>         | 0.73 (-150.80, 152.26)    | <b>0.99</b>              |
| <b>Left Leg Lean (g)</b>         | 9933.3<br>(9162.2, 10704.4)   | 9872.8<br>(9101.4, 10644.2)   | -60.52 (-167.07, 46.03)   | <b>0.27</b> | 10093.0<br>(9322.0, 10864.1)  | 9865.5<br>(9093.4, 10637.5)   | -227.60 (-338.86, -116.33)  | <b>&lt;0.001***</b> | -167.08 (-321.13, -13.02) | <b>0.034<sup>#</sup></b> |
| <b>Left Leg Mass (g)</b>         | 15016.4<br>(14124.6, 15908.2) | 14905.7<br>(14013.5, 15798.0) | -110.65 (-254.14, 32.83)  | <b>0.13</b> | 15023.8<br>(14132.0, 15915.6) | 14727.4<br>(13834.1, 15620.7) | -296.39 (-446.22, -146.57)  | <b>&lt;0.001***</b> | -185.74 (-393.19, 21.71)  | <b>0.08</b>              |
| <b>Left Leg Percent Fat (%)</b>  | 33.8<br>(30.5, 37.0)          | 33.5<br>(30.3, 36.8)          | -0.24 (-0.78, 0.30)       | <b>0.39</b> | 33.2 (29.9, 36.5)             | 33.3<br>(30.0, 36.6)          | 0.10 (-0.47, 0.67)          | <b>0.73</b>         | 0.34 (-0.44, 1.13)        | <b>0.39</b>              |
| <b>Right Leg Fat (g)</b>         | 5196.7<br>(4633.1, 5760.3)    | 5135.0<br>(4571.0, 5699.1)    | -61.66 (-168.03, 44.70)   | <b>0.26</b> | 5056.7<br>(4493.1, 5620.3)    | 4954.3<br>(4389.4, 5519.2)    | -102.37 (-213.43, 8.68)     | <b>0.07</b>         | -40.71 (-194.48, 113.06)  | <b>0.60</b>              |

|                                   |                               |                               |                            |             |                               |                               |                              |                     |                              |                |
|-----------------------------------|-------------------------------|-------------------------------|----------------------------|-------------|-------------------------------|-------------------------------|------------------------------|---------------------|------------------------------|----------------|
| <b>Right Leg Lean (g)</b>         | 10012.8<br>(9218.9, 10806.7)  | 9985.5<br>(9191.3, 10779.6)   | -27.35 (-133.99, 79.28)    | <b>0.62</b> | 10272.4<br>(9478.5, 11066.3)  | 10034.1<br>(9239.3, 10829.0)  | -238.22 (-349.58, -126.87)   | <b>&lt;0.001***</b> | -210.87 (-365.05, -56.69)    | <b>0.007##</b> |
| <b>Right Leg Mass (g)</b>         | 15217.4<br>(14295.4, 16139.5) | 15140.0<br>(14217.5, 16062.5) | -77.45 (-221.62, 66.72)    | <b>0.29</b> | 15329.1<br>(14407.0, 16251.1) | 14991.5<br>(14067.9, 15915.0) | -337.59 (-488.14, -187.05)   | <b>&lt;0.001***</b> | -260.14 (-468.58, -51.71)    | <b>0.014#</b>  |
| <b>Right Leg Percent Fat (%)</b>  | 34.2<br>(31.0, 37.4)          | 33.9<br>(30.7, 37.1)          | -0.29 (-0.82, 0.24)        | <b>0.28</b> | 33.3 (30.1, 36.5)             | 33.3<br>(30.1, 36.6)          | 0.03 (-0.52, 0.59)           | <b>0.91</b>         | 0.32 (-0.44, 1.09)           | <b>0.41</b>    |
| <b>Subtot Fat (g)</b>             | 29394.7<br>(26406.9, 32382.5) | 29378.3<br>(26387.9, 32368.7) | -16.42 (-644.01, 611.17)   | <b>0.96</b> | 29059.9<br>(26072.2, 32047.7) | 28551.8<br>(25555.5, 31548.1) | -508.15 (-1163.36, 147.07)   | <b>0.13</b>         | -491.73 (-1399.02, 415.56)   | <b>0.29</b>    |
| <b>Subtot Lean (g)</b>            | 58272.0<br>(53904.9, 62639.0) | 57956.0<br>(53587.4, 62324.7) | -315.95 (-904.54, 272.64)  | <b>0.29</b> | 58588.6<br>(54221.5, 62955.6) | 57489.0<br>(53116.8, 61861.2) | -1099.57 (-1714.23, -484.92) | <b>&lt;0.001***</b> | -783.62 (-1634.64, 67.40)    | <b>0.07</b>    |
| <b>Subtot Mass (g)</b>            | 87666.6<br>(82340.7, 92992.6) | 87340.7<br>(82012.0, 92669.3) | -325.97 (-1173.80, 521.87) | <b>0.45</b> | 87583.3<br>(82257.3, 92909.2) | 85923.0<br>(80588.3, 91257.8) | -1660.23 (-2545.55, -774.92) | <b>&lt;0.001***</b> | -1334.27 (-2560.08, -108.46) | <b>0.033#</b>  |
| <b>Subtot Percent Fat (%)</b>     | 33.5<br>(30.7, 36.3)          | 33.4<br>(30.6, 36.3)          | -0.07 (-0.59, 0.44)        | <b>0.78</b> | 33.4 (30.6, 36.2)             | 33.3<br>(30.5, 36.2)          | -0.08 (-0.61, 0.46)          | <b>0.77</b>         | 0.00 (-0.74, 0.74)           | <b>0.99</b>    |
| <b>Whole Body Fat Mass (g)</b>    | 30671.7<br>(27676.2, 33667.2) | 30643.6<br>(27645.5, 33641.7) | -28.10 (-658.75, 602.55)   | <b>0.93</b> | 30336.3<br>(27340.9, 33331.8) | 29829.5<br>(26825.4, 32833.5) | -506.89 (-1165.31, 151.52)   | <b>0.13</b>         | -478.80 (-1390.52, 432.92)   | <b>0.30</b>    |
| <b>Whole Body Lean Mass (g)</b>   | 62232.5<br>(57729.5, 66735.5) | 61887.3<br>(57382.7, 66391.9) | -345.24 (-943.82, 253.34)  | <b>0.26</b> | 62539.2<br>(58036.2, 67042.2) | 61447.8<br>(56939.6, 65956.0) | -1091.44 (-1716.53, -466.35) | <b>&lt;0.001***</b> | -746.20 (-1611.67, 119.26)   | <b>0.09</b>    |
| <b>Whole Body Total Mass (g)</b>  | 92904.2<br>(87440.5, 98367.9) | 92537.5<br>(87071.1, 98003.9) | -366.73 (-1227.63, 494.17) | <b>0.40</b> | 92779.9<br>(87316.2, 98243.6) | 91119.9<br>(85647.4, 96592.5) | -1659.96 (-2558.93, -760.99) | <b>&lt;0.001***</b> | -1293.23 (-2537.93, -48.53)  | <b>0.042#</b>  |
| <b>Whole Body Percent Fat (%)</b> | 33.0<br>(30.4, 35.7)          | 32.9<br>(30.3, 35.6)          | -0.07 (-0.55, 0.42)        | <b>0.78</b> | 32.9 (30.3, 35.6)             | 32.8<br>(30.2, 35.5)          | -0.09 (-0.59, 0.42)          | <b>0.74</b>         | -0.02 (-0.72, 0.68)          | <b>0.96</b>    |

|                                            |                         |                         |                           |             |                         |                         |                           |                     |                           |             |
|--------------------------------------------|-------------------------|-------------------------|---------------------------|-------------|-------------------------|-------------------------|---------------------------|---------------------|---------------------------|-------------|
| <b>Manual Anthropometrics</b>              |                         |                         |                           |             |                         |                         |                           |                     |                           |             |
| <b>Manual Height (cm)</b>                  | 172.3<br>(168.9, 175.6) | 172.3<br>(169.0, 175.7) | 0.07 (-0.04, 0.18)        | <b>0.24</b> | 171.4<br>(168.0, 174.7) | 171.4<br>(168.0, 174.7) | 0.01 (-0.11, 0.12)        | <b>0.90</b>         | -0.06 (-0.22, 0.10)       | <b>0.47</b> |
| <b>Weight (Kg)</b>                         | 93.0<br>(87.4, 98.5)    | 92.4<br>(86.9, 97.9)    | -0.57 (-1.40, 0.26)       | <b>0.18</b> | 92.6 (87.0, 98.1)       | 90.9<br>(85.3, 96.4)    | -1.70 (-2.56, -0.83)      | <b>&lt;0.001***</b> | -1.13 (-2.33, 0.07)       | <b>0.07</b> |
| <b>Manual BMI kg/m<sup>2</sup></b>         | 31.3<br>(29.8, 32.7)    | 31.1<br>(29.6, 32.5)    | -0.22 (-0.50, 0.06)       | <b>0.13</b> | 31.3 (29.8, 32.7)       | 30.7<br>(29.2, 32.1)    | -0.56 (-0.86, -0.27)      | <b>&lt;0.001***</b> | -0.35 (-0.75, 0.06)       | <b>0.09</b> |
| <b>Waist Circumference (Cm)</b>            | 106.6<br>(102.3, 110.8) | 105.9<br>(101.6, 110.2) | -0.69 (-4.28, 2.90)       | <b>0.71</b> | 106.3<br>(102.1, 110.5) | 104.5<br>(100.1, 108.9) | -1.81 (-5.53, 1.92)       | <b>0.34</b>         | -1.12 (-6.29, 4.05)       | <b>0.67</b> |
| <b>Hip Circumference (Cm)</b>              | 109.5<br>(106.2, 112.8) | 109.5<br>(106.2, 112.8) | 0.01 (-2.16, 2.18)        | <b>0.99</b> | 111.5<br>(108.2, 114.7) | 110.2<br>(106.8, 113.6) | -1.28 (-3.53, 0.98)       | <b>0.27</b>         | -1.29 (-4.42, 1.85)       | <b>0.42</b> |
| <b>Bicep Circumference (Cm)</b>            | 35.4<br>(34.4, 36.4)    | 35.3<br>(34.3, 36.4)    | -0.04 (-0.46, 0.38)       | <b>0.86</b> | 35.6 (34.6, 36.6)       | 35.3<br>(34.2, 36.3)    | -0.30 (-0.74, 0.14)       | <b>0.19</b>         | -0.26 (-0.87, 0.35)       | <b>0.41</b> |
| <b>Thigh Circumference (Cm)</b>            | 57.5<br>(55.9, 59.2)    | 57.8<br>(56.2, 59.5)    | 0.27 (-0.37, 0.90)        | <b>0.41</b> | 57.7 (56.1, 59.4)       | 57.6<br>(55.9, 59.2)    | -0.16 (-0.82, 0.51)       | <b>0.64</b>         | -0.42 (-1.35, 0.50)       | <b>0.37</b> |
| <b>Waist/Hip Ratio</b>                     | 0.980<br>(0.957, 1.004) | 0.970<br>(0.946, 0.994) | -0.0107 (-0.0287, 0.0074) | <b>0.25</b> | 0.953<br>(0.929, 0.977) | 0.948<br>(0.924, 0.973) | -0.0047 (-0.0234, 0.0140) | <b>0.62</b>         | 0.0060 (-0.0200, 0.0320)  | <b>0.65</b> |
| <b>Waist Height Ratio</b>                  | 0.623<br>(0.596, 0.650) | 0.616<br>(0.588, 0.643) | -0.0071 (-0.0248, 0.0107) | <b>0.44</b> | 0.622<br>(0.594, 0.649) | 0.612<br>(0.584, 0.640) | -0.0096 (-0.0281, 0.0088) | <b>0.31</b>         | -0.0026 (-0.0282, 0.0230) | <b>0.84</b> |
| <b>Biodex and Grip Dynamometer</b>         |                         |                         |                           |             |                         |                         |                           |                     |                           |             |
| <b>Isometric Peak Torque Away (ft-lbs)</b> | 109.3<br>(97.1, 121.4)  | 100.9<br>(88.5, 113.3)  | -8.39 (-17.60, 0.81)      | <b>0.07</b> | 105.8<br>(93.6, 117.9)  | 105.9<br>(93.4, 118.4)  | 0.15 (-9.24, 9.53)        | <b>0.98</b>         | 8.54 (-4.60, 21.69)       | <b>0.20</b> |

|                                                |                         |                         |                              |             |                         |                         |                           |             |                           |             |
|------------------------------------------------|-------------------------|-------------------------|------------------------------|-------------|-------------------------|-------------------------|---------------------------|-------------|---------------------------|-------------|
| <b>Isometric Peak Torque Toward (ft-lbs)</b>   | 70.3<br>(61.8, 78.7)    | 67.7<br>(59.1, 76.3)    | -2.53 (-7.38, 2.32)          | <b>0.31</b> | 70.8 (62.3, 79.3)       | 70.8<br>(62.1, 79.5)    | -0.03 (-4.98, 4.92)       | <b>0.99</b> | 2.50 (-4.42, 9.43)        | <b>0.48</b> |
| <b>Isometric Maximum Work Away (ft-lbs)</b>    | 0.259<br>(0.205, 0.313) | 0.218<br>(0.163, 0.273) | -0.0408<br>(-0.0832, 0.0016) | <b>0.06</b> | 0.224<br>(0.170, 0.278) | 0.238<br>(0.182, 0.294) | 0.0134 (-0.0298, 0.0567)  | <b>0.54</b> | 0.0542 (-0.0064, 0.1147)  | <b>0.08</b> |
| <b>Isometric Maximum Work Toward (ft-lbs)</b>  | 0.090<br>(0.067, 0.113) | 0.102<br>(0.078, 0.125) | 0.0116 (-0.0108, 0.0339)     | <b>0.31</b> | 0.099<br>(0.076, 0.122) | 0.092<br>(0.068, 0.117) | -0.0068 (-0.0296, 0.0160) | <b>0.56</b> | -0.0184 (-0.0503, 0.0135) | <b>0.26</b> |
| <b>Isokinetic Peak Torque Away (ft-lbs)</b>    | 104.6<br>(91.3, 117.9)  | 103.7<br>(90.1, 117.3)  | -0.88 (-11.25, 9.49)         | <b>0.87</b> | 98.9 (85.6, 112.2)      | 90.8<br>(76.9, 104.7)   | -8.09 (-18.88, 2.70)      | <b>0.14</b> | -7.21 (-22.18, 7.76)      | <b>0.35</b> |
| <b>Isokinetic Peak Torque Toward (ft-lbs)</b>  | 55.9<br>(48.9, 62.8)    | 58.2<br>(51.0, 65.3)    | 2.29 (-4.31, 8.90)           | <b>0.50</b> | 53.0 (46.1, 59.9)       | 51.4<br>(44.0, 58.7)    | -1.64 (-8.50, 5.21)       | <b>0.64</b> | -3.94 (-13.46, 5.58)      | <b>0.42</b> |
| <b>Isokinetic Maximum Work Away (ft-lbs)</b>   | 124.1<br>(106.8, 141.3) | 122.0<br>(104.5, 139.5) | -2.10 (-13.00, 8.79)         | <b>0.71</b> | 119.9<br>(102.7, 137.2) | 109.7<br>(91.9, 127.5)  | -10.20 (-21.55, 1.16)     | <b>0.08</b> | -8.09 (-23.83, 7.64)      | <b>0.31</b> |
| <b>Isokinetic Maximum Work Toward (ft-lbs)</b> | 65.1<br>(55.2, 74.9)    | 68.7<br>(58.6, 78.9)    | 3.68 (-6.30, 13.66)          | <b>0.47</b> | 63.4 (53.6, 73.2)       | 59.9<br>(49.4, 70.4)    | -3.56 (-13.90, 6.78)      | <b>0.50</b> | -7.24 (-21.62, 7.13)      | <b>0.32</b> |
| <b>Handgrip Strength (kg)</b>                  | 30.8<br>(26.8, 34.8)    | 31.1<br>(27.1, 35.1)    | 0.31 (-1.21, 1.83)           | <b>0.69</b> | 28.3 (24.3, 32.3)       | 28.8<br>(24.8, 32.8)    | 0.49 (-1.09, 2.08)        | <b>0.54</b> | 0.18 (-2.02, 2.38)        | <b>0.87</b> |

All data is presented as means (95% confidence interval). For data with statistical outliers, winsorised data was used to generate means, confidence intervals, and *p* values.

\*within-group *p* value less than 0.05

\*\*within group *p* value less than 0.01

\*\*\*within group *p* value less than 0.001

#between group *p* value less than 0.05

##between group *p* value less than 0.01

###between group *p* value less than 0.001



eTable 3. Other blood markers in in-person cohort

|                                        | CMT Pre<br>(n=25)          | CMT Post<br>(n=24)         | ΔCMT                             | ΔCMT p<br>value | TRE Pre<br>(n=25)          | TRE Post<br>(n=22)         | ΔTRE                             | ΔTRE p<br>value | Difference<br>between groups | p value                  |
|----------------------------------------|----------------------------|----------------------------|----------------------------------|-----------------|----------------------------|----------------------------|----------------------------------|-----------------|------------------------------|--------------------------|
| <b>GGT (U/L)</b>                       | 25.9 (19.9,<br>31.9)       | 23.7<br>(17.7,<br>29.6)    | -2.22 (-<br>3.93, -<br>0.50)     | <b>0.011*</b>   | 24.0 (18.0,<br>30.0)       | 22.1<br>(16.2,<br>28.1)    | -1.86 (-<br>3.65, -0.07)         | <b>0.042*</b>   | 0.36 (-2.12, 2.84)           | <b>0.78</b>              |
| <b>ALT (U/L)</b>                       | 34.0 (27.3,<br>40.6)       | 30.6<br>(23.9,<br>37.3)    | -3.38 (-<br>5.63, -<br>1.13)     | <b>0.003**</b>  | 30.5 (23.8,<br>37.2)       | 28.1<br>(21.4,<br>34.8)    | -2.40 (-<br>4.75, -0.06)         | <b>0.045*</b>   | 0.98 (-2.27, 4.23)           | <b>0.55</b>              |
| <b>AST (U/L)</b>                       | 28.1 (24.8,<br>31.4)       | 26.5<br>(23.2,<br>29.8)    | -1.59 (-<br>3.56,<br>0.38)       | <b>0.11</b>     | 26.5 (23.2,<br>29.8)       | 25.7<br>(22.4,<br>29.1)    | -0.77 (-<br>2.82, 1.29)          | <b>0.46</b>     | 0.82 (-2.02, 3.67)           | <b>0.57</b>              |
| <b>ALK (U/L)</b>                       | 58.3 (51.5,<br>65.1)       | 56.9<br>(50.1,<br>63.7)    | -1.37 (-<br>3.60,<br>0.86)       | <b>0.23</b>     | 57.8 (51.0,<br>64.6)       | 56.7<br>(49.9,<br>63.6)    | -1.09 (-<br>3.41, 1.24)          | <b>0.36</b>     | 0.28 (-2.94, 3.51)           | <b>0.86</b>              |
| <b>AMY (U/L)</b>                       | 61.3 (53.3,<br>69.3)       | 62.2<br>(54.2,<br>70.3)    | 0.93 (-<br>3.42,<br>5.28)        | <b>0.68</b>     | 57.2 (49.2,<br>65.2)       | 57.9<br>(49.8,<br>66.1)    | 0.71 (-3.82,<br>5.24)            | <b>0.76</b>     | -0.22 (-6.50,<br>6.06)       | <b>0.95</b>              |
| <b>LDH (U/L)</b>                       | 155.2<br>(144.3,<br>166.0) | 145.2<br>(134.3,<br>156.2) | -9.92 (-<br>19.80, -<br>0.04)    | <b>0.049*</b>   | 149.8<br>(139.0,<br>160.7) | 154.3<br>(143.0,<br>165.6) | 4.45 (-5.79,<br>14.68)           | <b>0.39</b>     | 14.37 (0.14,<br>28.60)       | <b>0.048<sup>#</sup></b> |
| <b>Total<br/>Bilirubin<br/>(mg/dL)</b> | 0.790<br>(0.694,<br>0.886) | 0.762<br>(0.664,<br>0.859) | -0.0284 (-<br>0.1113,<br>0.0544) | <b>0.50</b>     | 0.856<br>(0.760,<br>0.952) | 0.829<br>(0.729,<br>0.929) | -0.0267 (-<br>0.1126,<br>0.0592) | <b>0.54</b>     | 0.0018 (-0.1176,<br>0.1211)  | <b>0.98</b>              |
| <b>BUN (mg/dL)</b>                     | 16.4 (15.0,<br>17.8)       | 16.5<br>(15.1,<br>17.9)    | 0.11 (-<br>1.03,<br>1.24)        | <b>0.85</b>     | 14.9 (13.5,<br>16.3)       | 14.8<br>(13.3,<br>16.2)    | -0.10 (-<br>1.28, 1.08)          | <b>0.87</b>     | -0.21 (-1.84,<br>1.43)       | <b>0.80</b>              |
| <b>CRE (mg/dL)</b>                     | 0.864<br>(0.794,<br>0.934) | 0.845<br>(0.774,<br>0.915) | -0.0195 (-<br>0.0548,<br>0.0158) | <b>0.28</b>     | 0.854<br>(0.784,<br>0.924) | 0.841<br>(0.770,<br>0.912) | -0.0127 (-<br>0.0495,<br>0.0241) | <b>0.50</b>     | 0.0068 (-0.0442,<br>0.0578)  | <b>0.79</b>              |
| <b>CPK (U/L)</b>                       | 140.2<br>(105.3,<br>175.1) | 145.5<br>(110.2,<br>180.7) | 5.28 (-<br>21.95,<br>32.50)      | <b>0.70</b>     | 142.1<br>(107.2,<br>177.0) | 128.0<br>(91.9,<br>164.0)  | -14.15 (-<br>42.42,<br>14.11)    | <b>0.33</b>     | -19.43 (-58.68,<br>19.82)    | <b>0.33</b>              |
| <b>Albumin<br/>(g/dL)</b>              | 4.25 (4.14,<br>4.35)       | 4.22<br>(4.11,<br>4.32)    | -0.033 (-<br>0.119,<br>0.053)    | <b>0.45</b>     | 4.21 (4.10,<br>4.31)       | 4.22<br>(4.11,<br>4.33)    | 0.013 (-<br>0.077,<br>0.102)     | <b>0.78</b>     | 0.046 (-0.078,<br>0.170)     | <b>0.47</b>              |

|                               |                      |                      |                          |              |                      |                      |                          |             |                          |                           |
|-------------------------------|----------------------|----------------------|--------------------------|--------------|----------------------|----------------------|--------------------------|-------------|--------------------------|---------------------------|
| <b>TP (g/dL)</b>              | 7.00 (6.85, 7.16)    | 6.93 (6.77, 7.08)    | -0.079 (-0.211, 0.053)   | <b>0.24</b>  | 6.98 (6.83, 7.14)    | 6.98 (6.83, 7.14)    | -0.001 (-0.138, 0.135)   | <b>0.99</b> | 0.077 (-0.112, 0.267)    | <b>0.42</b>               |
| <b>BHBA (mmol/L)</b>          | 0.052 (0.039, 0.065) | 0.061 (0.048, 0.075) | 0.0089 (-0.0072, 0.0250) | <b>0.28</b>  | 0.041 (0.028, 0.054) | 0.051 (0.037, 0.065) | 0.0098 (-0.0067, 0.0264) | <b>0.24</b> | 0.0009 (-0.0221, 0.0240) | <b>0.94</b>               |
| <b>CO<sub>2</sub> (mEq/L)</b> | 24.5 (23.8, 25.2)    | 24.3 (23.6, 25.0)    | -0.15 (-0.78, 0.48)      | <b>0.64</b>  | 24.6 (23.9, 25.3)    | 24.2 (23.5, 24.9)    | -0.44 (-1.09, 0.22)      | <b>0.19</b> | -0.29 (-1.20, 0.62)      | <b>0.53</b>               |
| <b>Uric Acid (mg/dL)</b>      | 5.59 (5.16, 6.02)    | 5.99 (5.56, 6.43)    | 0.401 (0.096, 0.706)     | <b>0.01*</b> | 5.94 (5.52, 6.37)    | 5.75 (5.31, 6.19)    | -0.194 (-0.511, 0.123)   | <b>0.23</b> | -0.595 (-1.034, -0.155)  | <b>0.008<sup>##</sup></b> |
| <b>Ca (mg/dL)</b>             | 9.24 (9.12, 9.37)    | 9.22 (9.10, 9.35)    | -0.022 (-0.109, 0.065)   | <b>0.62</b>  | 9.28 (9.15, 9.40)    | 9.30 (9.17, 9.43)    | 0.027 (-0.063, 0.118)    | <b>0.56</b> | 0.049 (-0.076, 0.174)    | <b>0.44</b>               |
| <b>Cl (mEq/L)</b>             | 104.0 (103.4, 104.7) | 104.1 (103.4, 104.8) | 0.08 (-0.63, 0.78)       | <b>0.83</b>  | 103.9 (103.3, 104.6) | 104.1 (103.4, 104.9) | 0.21 (-0.52, 0.94)       | <b>0.58</b> | 0.13 (-0.88, 1.14)       | <b>0.80</b>               |
| <b>Fe (mcg/dL)</b>            | 110.5 (98.2, 122.7)  | 102.1 (89.7, 114.6)  | -8.32 (-21.49, 4.84)     | <b>0.22</b>  | 93.4 (81.1, 105.7)   | 93.4 (80.4, 106.3)   | -0.03 (-13.62, 13.56)    | <b>1.00</b> | 8.29 (-10.62, 27.21)     | <b>0.39</b>               |
| <b>Hb (g/dL)</b>              | 15.3 (14.6, 15.9)    | 15.6 (15.0, 16.3)    | 0.36 (-0.38, 1.10)       | <b>0.34</b>  | 16.0 (15.4, 16.7)    | 15.8 (15.1, 16.5)    | -0.18 (-0.94, 0.59)      | <b>0.65</b> | -0.54 (-1.60, 0.53)      | <b>0.32</b>               |
| <b>K (mEq/L)</b>              | 4.12 (4.00, 4.23)    | 4.10 (3.99, 4.22)    | -0.011 (-0.117, 0.096)   | <b>0.84</b>  | 4.12 (4.00, 4.23)    | 4.17 (4.05, 4.29)    | 0.050 (-0.060, 0.161)    | <b>0.37</b> | 0.061 (-0.093, 0.214)    | <b>0.44</b>               |
| <b>Mg (mg/dL)</b>             | 2.09 (2.03, 2.15)    | 2.07 (2.01, 2.13)    | -0.015 (-0.057, 0.028)   | <b>0.50</b>  | 2.07 (2.01, 2.13)    | 2.06 (2.00, 2.12)    | -0.007 (-0.051, 0.038)   | <b>0.77</b> | 0.008 (-0.053, 0.069)    | <b>0.80</b>               |
| <b>Na (mEq/L)</b>             | 137.5 (136.9, 138.1) | 137.8 (137.1, 138.4) | 0.24 (-0.34, 0.82)       | <b>0.42</b>  | 137.7 (137.1, 138.3) | 137.7 (137.1, 138.3) | 0.01 (-0.60, 0.61)       | <b>0.99</b> | -0.23 (-1.07, 0.60)      | <b>0.59</b>               |
| <b>Phos (mg/dL)</b>           | 3.22 (3.04, 3.39)    | 3.37 (3.19, 3.54)    | 0.153 (-0.034, 0.340)    | <b>0.11</b>  | 3.61 (3.44, 3.78)    | 3.61 (3.42, 3.79)    | -0.003 (-0.196, 0.190)   | <b>0.98</b> | -0.156 (-0.424, 0.112)   | <b>0.25</b>               |

All data is presented as means (95% confidence interval). For data with statistical outliers, winsorised data was used to generate  $p$  value.

GGT, gamma-glutamyl transferase; ALT, alanine aminotransferase; AST, aspartate aminotransferase; ALK, alkaline phosphatase; AMY, amylase; LDH, lactate dehydrogenase; BUN, blood urea nitrogen; Cre, creatinine; CPK, creatine phosphokinase; TP, total protein; BHBA, beta hydroxy butyrate; CO<sub>2</sub>, carbon dioxide; Ca, calcium; Cl, chloride; Fe, iron; Hb, hemoglobin; K, potassium; Mg, magnesium; Na, sodium; Phos, phosphate.

\*within-group  $p$  value less than 0.05

\*\*within group  $p$  value less than 0.01

#between group  $p$  value less than 0.05

##between group  $p$  value less than 0.01

eTable 4. MOCACARE at home blood pressure measurements in total cohort.

|                                                    | <b>CMT Pre<br/>(n=23)</b>  | <b>CMT Post<br/>(n=23)</b> | <b>ΔCMT</b>                  | <b>ΔCMT <i>p</i><br/>value</b> | <b>TRE Pre<br/>(n=16)</b> | <b>TRE<br/>Post<br/>(n=16)</b> | <b>ΔTRE</b>              | <b>ΔTRE <i>p</i><br/>value</b> | <b>Difference<br/>between groups</b> | <b><i>p</i> value</b> |
|----------------------------------------------------|----------------------------|----------------------------|------------------------------|--------------------------------|---------------------------|--------------------------------|--------------------------|--------------------------------|--------------------------------------|-----------------------|
| <b>Systolic<br/>Blood<br/>Pressure<br/>(mmHg)</b>  | 129.7<br>(124.9,<br>134.4) | 124.3<br>(119.9,<br>128.7) | -5.38 (-<br>9.13, -<br>1.62) | <b>0.005**</b>                 | 126.5 (120.9,<br>132.1)   | 124.0<br>(118.8,<br>129.2)     | -2.51 (-<br>7.04, 2.03)  | <b>0.28</b>                    | 2.87 (-3.02, 8.76)                   | <b>0.34</b>           |
| <b>Diastolic<br/>Blood<br/>Pressure<br/>(mmHg)</b> | 81.0 (77.9,<br>84.1)       | 78.9<br>(75.9,<br>81.8)    | -2.10 (-<br>4.36,<br>0.17)   | <b>0.07</b>                    | 78.9 (75.2,<br>82.5)      | 75.3<br>(71.8,<br>78.8)        | -3.55 (-<br>6.28, -0.82) | <b>0.011*</b>                  | -1.45 (-5.01, 2.10)                  | <b>0.42</b>           |

All data is presented as means (95% confidence interval). For data with statistical outliers, winsorised data was used to generate means, confidence intervals, and *p* values.

\*within-group *p* value less than 0.05

\*\*within group *p* value less than 0.01

eTable 5. Self-reported sleep measures.

|                                | <b>CMT Pre</b>                 | <b>CMT Post</b>                | <b>ΔCMT</b>                   | <b>ΔCMT<br/>p<br/>value</b> | <b>TRE Pre</b>                 | <b>TRE Post</b>                | <b>ΔTRE</b>                   | <b>ΔTRE p<br/>value</b> | <b>Difference<br/>between groups</b> | <b>P value</b> |
|--------------------------------|--------------------------------|--------------------------------|-------------------------------|-----------------------------|--------------------------------|--------------------------------|-------------------------------|-------------------------|--------------------------------------|----------------|
| <b>PSQI<br/>Score</b>          | 4.63 (4.02,<br>5.24)<br>(n=43) | 4.26 (3.65,<br>4.87)<br>(n=43) | -0.366 (-<br>0.820,<br>0.087) | <b>0.11</b>                 | 4.62 (4.02,<br>5.22)<br>(n=46) | 4.60 (3.99,<br>5.20)<br>(n=44) | -0.018 (-<br>0.455,<br>0.420) | <b>0.94</b>             | 0.349 (-0.281,<br>0.979)             | <b>0.28</b>    |
| <b>RED<br/>Scale<br/>Score</b> | 21.8 (19.6,<br>23.9)<br>(n=41) | 21.1 (18.8,<br>23.4)<br>(n=29) | -0.68 (-<br>2.27,<br>0.91)    | <b>0.40</b>                 | 23.1 (21.0,<br>25.2)<br>(n=44) | 22.0 (19.8,<br>24.3)<br>(n=28) | -1.11 (-<br>2.68,<br>0.45)    | <b>0.16</b>             | -0.43 (-2.66, 1.79)                  | <b>0.70</b>    |

All data is presented as means (95% confidence interval). For data with statistical outliers, winsorised data was used to generate means, confidence intervals, and *p* values.

In scoring the PSQI, seven component scores are derived, each scored 0 (no difficulty) to 3 (severe difficulty). The component scores are summed to produce a global score (range 0 to 21). Higher scores indicate worse sleep quality.

For the RED Scale, participants read statements about food and eating. On a scale of 1- "Not at all like me" to 5- "Exactly like me", participants rated how they agreed with the statement. Score ranges from 9-45; higher scores indicate higher rewards-based eating drive.

PSQI, Pittsburg Sleep Quality Index; RED Scale, Rewards-based Eating Drive Scale.

eTable 6. Sleep and activity measures from Oura ring in in-person cohort.

|                                   | CMT Pre                 | CMT Post                | ΔCMT                       | ΔCMT <i>p</i> value | TRE Pre                 | TRE Post                | ΔTRE                          | ΔTRE <i>p</i> value | Difference between groups    | <i>P</i> value |
|-----------------------------------|-------------------------|-------------------------|----------------------------|---------------------|-------------------------|-------------------------|-------------------------------|---------------------|------------------------------|----------------|
|                                   | n=17 subjects analyzed  |                         |                            |                     | n=17 subjects analyzed  |                         |                               |                     |                              |                |
| <b>Activity Balance Score</b>     | 84.0 (79.9, 88.0)       | 84.1 (78.3, 90.0)       | 0.18 (-6.66, 7.03)         | <b>0.96</b>         | 85.2 (81.1, 89.2)       | 89.0 (83.4, 94.7)       | 3.89 (-2.76, 10.53)           | <b>0.25</b>         | 3.71 (-5.84, 13.25)          | <b>0.45</b>    |
| <b>Activity Burn</b>              | 401.1 (325.0, 477.2)    | 380.7 (292.6, 468.9)    | -20.35 (-77.45, 36.75)     | <b>0.48</b>         | 394.2 (318.1, 470.2)    | 289.9 (203.9, 375.8)    | -104.29 (-158.60, -49.98)     | <b>&lt;0.001***</b> | -83.94 (-162.74, -5.14)      | <b>0.037#</b>  |
| <b>Activity Score</b>             | 76.5 (70.4, 82.6)       | 72.6 (65.8, 79.4)       | -3.89 (-9.74, 1.97)        | <b>0.19</b>         | 80.2 (74.1, 86.3)       | 70.7 (64.1, 77.4)       | -9.44 (-15.07, -3.82)         | <b>&lt;0.001***</b> | -5.56 (-13.68, 2.56)         | <b>0.18</b>    |
| <b>Average HRV</b>                | 35.6 (25.8, 45.4)       | 30.6 (22.0, 39.2)       | -5.04 (-13.29, 3.21)       | <b>0.23</b>         | 39.9 (30.2, 49.7)       | 42.9 (34.5, 51.4)       | 3.00 (-5.03, 11.03)           | <b>0.46</b>         | 8.04 (-3.47, 19.55)          | <b>0.17</b>    |
| <b>Average MET</b>                | 1.43 (1.37, 1.48)       | 1.42 (1.36, 1.48)       | -0.007 (-0.046, 0.031)     | <b>0.72</b>         | 1.42 (1.37, 1.48)       | 1.36 (1.30, 1.42)       | -0.061 (-0.097, -0.024)       | <b>0.001***</b>     | -0.054 (-0.107, 0.000)       | <b>0.049#</b>  |
| <b>Average Resting Heart Rate</b> | 65.6 (61.9, 69.3)       | 65.9 (61.9, 69.9)       | 0.31 (-1.75, 2.36)         | <b>0.77</b>         | 65.2 (61.5, 68.9)       | 64.9 (61.0, 68.9)       | -0.25 (-2.25, 1.75)           | <b>0.81</b>         | -0.56 (-3.43, 2.31)          | <b>0.70</b>    |
| <b>Awake Time</b>                 | 3829.7 (3285.1, 4374.3) | 3414.5 (2710.7, 4118.3) | -415.26 (-1130.07, 299.55) | <b>0.25</b>         | 3270.9 (2727.9, 3813.9) | 4169.4 (3477.9, 4861.0) | 898.53 (195.68, 1601.37)      | <b>0.012*</b>       | 1313.79 (311.32, 2316.26)    | <b>0.01#</b>   |
| <b>Daily Movement</b>             | 7054.5 (5659.7, 8449.2) | 6625.8 (4965.8, 8285.8) | -428.70 (-1542.25, 684.85) | <b>0.45</b>         | 7196.8 (5803.7, 8590.0) | 5094.7 (3476.0, 6713.4) | -2102.14 (-3162.54, -1041.73) | <b>&lt;0.001***</b> | -1673.44 (-3211.11, -135.76) | <b>0.033#</b>  |
| <b>Deep Sleep Score</b>           | 65.6 (54.5, 76.8)       | 66.7 (56.6, 76.8)       | 1.08 (-8.04, 10.20)        | <b>0.82</b>         | 78.8 (67.7, 89.9)       | 83.0 (73.0, 93.0)       | 4.22 (-4.74, 13.19)           | <b>0.36</b>         | 3.14 (-9.64, 15.93)          | <b>0.63</b>    |
| <b>Deep Sleep Time</b>            | 3827.3 (2722.7, 4931.9) | 3669.7 (2603.2, 4736.2) | -157.57 (-1000.79, 685.65) | <b>0.71</b>         | 5106.5 (4002.6, 6210.4) | 5467.7 (4416.1, 6519.4) | 361.21 (-463.97, 1186.39)     | <b>0.39</b>         | 518.79 (-661.02, 1698.59)    | <b>0.39</b>    |
| <b>High Activity Time</b>         | 1.21 (0.63, 1.78)       | 0.53 (-0.07, 1.13)      | -0.677 (-1.061, -0.292)    | <b>&lt;0.001***</b> | 1.25 (0.67, 1.83)       | 0.98 (0.41, 1.56)       | -0.265 (-0.627, 0.097)        | <b>0.15</b>         | 0.412 (-0.116, 0.940)        | <b>0.13</b>    |

|                                    |                                  |                                  |                                   |               |                                  |                                  |                                   |                     |                                |             |
|------------------------------------|----------------------------------|----------------------------------|-----------------------------------|---------------|----------------------------------|----------------------------------|-----------------------------------|---------------------|--------------------------------|-------------|
| <b>Inactive Time</b>               | 514.6<br>(451.4,<br>577.9)       | 472.1<br>(395.6,<br>548.6)       | -42.52 (-<br>84.55, -<br>0.49)    | <b>0.047*</b> | 476.0<br>(412.8,<br>539.1)       | 387.1<br>(312.2,<br>462.0)       | -88.90 (-<br>128.60, -<br>49.19)  | <b>&lt;0.001***</b> | -46.38 (-104.20,<br>11.44)     | <b>0.12</b> |
| <b>Light Sleep Time</b>            | 13525.6<br>(12043.5,<br>15007.7) | 14788.1<br>(12824.7,<br>16751.5) | 1262.53 (-<br>670.62,<br>3195.68) | <b>0.20</b>   | 14099.2<br>(12619.2,<br>15579.2) | 14750.8<br>(12835.0,<br>16666.5) | 651.54 (-<br>1229.26,<br>2532.33) | <b>0.50</b>         | -610.99 (-3308.12,<br>2086.13) | <b>0.66</b> |
| <b>Long Periods of Inactivity</b>  | 0.431<br>(0.257,<br>0.606)       | 0.454<br>(0.231,<br>0.678)       | 0.0230 (-<br>0.1457,<br>0.1916)   | <b>0.79</b>   | 0.538<br>(0.364,<br>0.712)       | 0.468<br>(0.257,<br>0.680)       | -0.0697 (-<br>0.2272,<br>0.0879)  | <b>0.39</b>         | -0.0926 (-0.3235,<br>0.1382)   | <b>0.43</b> |
| <b>Low Activity Time</b>           | 266.3<br>(222.2,<br>310.4)       | 254.5<br>(208.9,<br>300.1)       | -11.85 (-<br>44.74,<br>21.04)     | <b>0.48</b>   | 233.5<br>(189.5,<br>277.6)       | 184.9<br>(140.0,<br>229.8)       | -48.62 (-<br>80.28, -<br>16.96)   | <b>0.003**</b>      | -36.77 (-82.42,<br>8.88)       | <b>0.11</b> |
| <b>Lowest Resting Heart Rate</b>   | 56.8<br>(53.2,<br>60.4)          | 57.6 (53.8,<br>61.4)             | 0.80 (-<br>1.02,<br>2.61)         | <b>0.39</b>   | 56.4 (52.8,<br>60.0)             | 56.0<br>(52.2,<br>59.8)          | -0.42 (-<br>2.19, 1.35)           | <b>0.64</b>         | -1.22 (-3.76, 1.32)            | <b>0.35</b> |
| <b>Medium Activity Time</b>        | 33.6<br>(24.6,<br>42.6)          | 31.7 (19.7,<br>43.8)             | -1.88 (-<br>10.52,<br>6.76)       | <b>0.67</b>   | 39.9 (30.9,<br>48.9)             | 28.6<br>(16.9,<br>40.3)          | -11.22 (-<br>19.45, -<br>2.99)    | <b>0.008**</b>      | -9.35 (-21.28,<br>2.59)        | <b>0.12</b> |
| <b>Meet Daily Targets Score</b>    | 61.1<br>(45.9,<br>76.3)          | 54.8 (39.4,<br>70.2)             | -6.33 (-<br>20.09,<br>7.44)       | <b>0.37</b>   | 59.4 (44.2,<br>74.6)             | 35.3<br>(20.3,<br>50.2)          | -24.13 (-<br>37.39, -<br>10.86)   | <b>&lt;0.001***</b> | -17.80 (-36.92,<br>1.32)       | <b>0.07</b> |
| <b>Move Every Hour Score</b>       | 97.6<br>(96.7,<br>98.6)          | 97.5 (96.3,<br>98.8)             | -0.08 (-<br>1.03,<br>0.87)        | <b>0.87</b>   | 97.1 (96.2,<br>98.1)             | 97.5<br>(96.3,<br>98.7)          | 0.35 (-0.53,<br>1.24)             | <b>0.43</b>         | 0.43 (-0.86, 1.73)             | <b>0.51</b> |
| <b>Non-wear Time</b>               | 95.1<br>(37.1,<br>153.1)         | 124.8 (50.5,<br>199.1)           | 29.73 (-<br>31.78,<br>91.24)      | <b>0.34</b>   | 120.7<br>(62.8,<br>178.7)        | 230.2<br>(157.6,<br>302.9)       | 109.50<br>(50.46,<br>168.53)      | <b>&lt;0.001***</b> | 79.76 (-5.49,<br>165.02)       | <b>0.07</b> |
| <b>Previous Day Activity Score</b> | 79.7<br>(73.9,<br>85.4)          | 77.0 (70.1,<br>83.9)             | -2.66 (-<br>7.38,<br>2.05)        | <b>0.27</b>   | 75.3 (69.6,<br>81.1)             | 70.5<br>(63.7,<br>77.4)          | -4.78 (-<br>9.38, -0.19)          | <b>0.041*</b>       | -2.12 (-8.70, 4.47)            | <b>0.53</b> |
| <b>Previous Night Score</b>        | 73.7<br>(69.2,<br>78.2)          | 69.1 (63.7,<br>74.6)             | -4.55 (-<br>10.36,<br>1.27)       | <b>0.13</b>   | 74.3 (69.8,<br>78.7)             | 69.3<br>(64.1,<br>74.5)          | -4.95 (-<br>10.63,<br>0.73)       | <b>0.09</b>         | -0.41 (-8.53, 7.72)            | <b>0.92</b> |
| <b>Readiness Score</b>             | 77.2<br>(74.6,<br>79.8)          | 76.1 (73.4,<br>78.8)             | -1.08 (-<br>3.88,<br>1.72)        | <b>0.45</b>   | 79.4 (76.8,<br>82.0)             | 77.5<br>(74.9,<br>80.0)          | -1.97 (-<br>4.70, 0.77)           | <b>0.16</b>         | -0.88 (-4.80, 3.03)            | <b>0.66</b> |

|                                 |                            |                         |                              |               |                         |                         |                             |                     |                            |               |
|---------------------------------|----------------------------|-------------------------|------------------------------|---------------|-------------------------|-------------------------|-----------------------------|---------------------|----------------------------|---------------|
| <b>Recovery Index Score</b>     | 67.5<br>(61.8, 73.1)       | 63.5 (56.1, 70.9)       | -4.01 (-11.75, 3.74)         | <b>0.31</b>   | 74.2 (68.6, 79.8)       | 67.7 (60.7, 74.8)       | -6.48 (-14.00, 1.05)        | <b>0.09</b>         | -2.47 (-13.27, 8.33)       | <b>0.65</b>   |
| <b>Recovery Time Score</b>      | 94.6<br>(89.4, 99.9)       | 93.8 (88.2, 99.3)       | -0.86 (-4.90, 3.18)          | <b>0.68</b>   | 97.7 (92.4, 102.9)      | 100.7 (95.3, 106.0)     | 3.00 (-0.86, 6.86)          | <b>0.13</b>         | 3.86 (-1.73, 9.45)         | <b>0.18</b>   |
| <b>REM Sleep Score</b>          | 83.4<br>(74.9, 91.8)       | 79.7 (70.3, 89.1)       | -3.71 (-9.63, 2.21)          | <b>0.22</b>   | 80.8 (72.4, 89.2)       | 74.9 (65.6, 84.2)       | -5.86 (-11.65, -0.07)       | <b>0.047*</b>       | -2.15 (-10.43, 6.13)       | <b>0.61</b>   |
| <b>REM Sleep Time</b>           | 7722.6<br>(6381.6, 9063.6) | 6180.8 (4842.3, 7519.3) | -1541.78 (-2935.64, -147.92) | <b>0.03*</b>  | 6649.8 (5310.0, 7989.6) | 5456.5 (4147.4, 6765.6) | -1193.30 (-2557.89, 171.29) | <b>0.09</b>         | 348.48 (-1602.15, 2299.11) | <b>0.73</b>   |
| <b>Respiratory Rate</b>         | 15.3<br>(14.6, 16.0)       | 15.3 (14.6, 16.0)       | 0.02 (-0.29, 0.32)           | <b>0.91</b>   | 15.4 (14.7, 16.1)       | 15.6 (14.9, 16.3)       | 0.18 (-0.12, 0.48)          | <b>0.23</b>         | 0.16 (-0.26, 0.59)         | <b>0.45</b>   |
| <b>Resting Heart Rate Score</b> | 82.4<br>(78.3, 86.4)       | 79.1 (74.1, 84.2)       | -3.24 (-9.32, 2.85)          | <b>0.30</b>   | 84.9 (80.9, 88.9)       | 81.7 (76.9, 86.5)       | -3.18 (-9.13, 2.76)         | <b>0.29</b>         | 0.05 (-8.45, 8.56)         | <b>0.99</b>   |
| <b>Restless Sleep</b>           | 36.6<br>(30.5, 42.8)       | 35.9 (29.7, 42.2)       | -0.68 (-3.82, 2.45)          | <b>0.67</b>   | 38.2 (32.0, 44.3)       | 38.4 (32.2, 44.6)       | 0.21 (-2.85, 3.27)          | <b>0.89</b>         | 0.90 (-3.49, 5.28)         | <b>0.69</b>   |
| <b>Rest Time</b>                | 472.9<br>(438.5, 507.3)    | 412.5 (355.3, 469.7)    | -60.39 (-115.47, -5.31)      | <b>0.032*</b> | 486.5 (452.2, 520.9)    | 383.3 (328.3, 438.2)    | -103.25 (-155.98, -50.52)   | <b>&lt;0.001***</b> | -42.86 (-119.11, 33.40)    | <b>0.27</b>   |
| <b>Sleep Balance Score</b>      | 74.2<br>(68.9, 79.4)       | 78.4 (71.0, 85.8)       | 4.25 (-3.53, 12.04)          | <b>0.28</b>   | 78.6 (73.3, 83.8)       | 77.4 (70.3, 84.6)       | -1.17 (-8.69, 6.36)         | <b>0.76</b>         | -5.42 (-16.25, 5.40)       | <b>0.33</b>   |
| <b>Sleep Efficiency</b>         | 87.1<br>(85.4, 88.9)       | 88.0 (85.9, 90.1)       | 0.89 (-1.28, 3.06)           | <b>0.42</b>   | 88.8 (87.1, 90.5)       | 86.1 (84.0, 88.2)       | -2.68 (-4.82, -0.55)        | <b>0.014*</b>       | -3.58 (-6.62, -0.53)       | <b>0.021#</b> |
| <b>Sleep Efficiency Score</b>   | 86.8<br>(83.6, 90.1)       | 88.6 (84.4, 92.7)       | 1.74 (-2.62, 6.09)           | <b>0.43</b>   | 90.0 (86.7, 93.2)       | 84.8 (80.7, 88.8)       | -5.22 (-9.50, -0.94)        | <b>0.017*</b>       | -6.96 (-13.06, -0.85)      | <b>0.026#</b> |
| <b>Sleep Latency</b>            | 673.8<br>(513.3, 834.4)    | 634.2 (449.3, 819.1)    | -39.65 (-211.18, 131.88)     | <b>0.65</b>   | 736.5 (576.4, 896.6)    | 767.1 (587.9, 946.2)    | 30.55 (-137.42, 198.52)     | <b>0.72</b>         | 70.20 (-169.87, 310.27)    | <b>0.57</b>   |



|                                |                            |                            |                             |             |                            |                            |                               |                     |                              |               |
|--------------------------------|----------------------------|----------------------------|-----------------------------|-------------|----------------------------|----------------------------|-------------------------------|---------------------|------------------------------|---------------|
| <b>Sleep Latency Score</b>     | 84.1 (81.7, 86.5)          | 85.2 (82.1, 88.3)          | 1.03 (-1.69, 3.74)          | <b>0.46</b> | 84.6 (82.2, 87.0)          | 81.7 (78.7, 84.7)          | -2.94 (-5.57, -0.32)          | <b>0.028*</b>       | -3.97 (-7.75, -0.19)         | <b>0.039#</b> |
| <b>Sleep Score</b>             | 79.7 (76.3, 83.1)          | 78.5 (75.2, 81.9)          | -1.17 (-4.29, 1.95)         | <b>0.46</b> | 79.7 (76.3, 83.1)          | 77.6 (74.4, 80.8)          | -2.14 (-5.21, 0.93)           | <b>0.17</b>         | -0.97 (-5.34, 3.41)          | <b>0.67</b>   |
| <b>Sleep Timing</b>            | 14743.5 (13995.1, 15491.9) | 14095.1 (13294.8, 14895.4) | -648.44 (-1375.71, 78.84)   | <b>0.08</b> | 14546.0 (13800.5, 15291.6) | 14966.9 (14174.8, 15759.1) | 420.91 (-296.90, 1138.71)     | <b>0.25</b>         | 1069.34 (47.50, 2091.19)     | <b>0.04#</b>  |
| <b>Sleep Timing Score</b>      | 88.4 (79.5, 97.3)          | 80.4 (69.5, 91.3)          | -8.04 (-17.63, 1.56)        | <b>0.10</b> | 66.5 (57.6, 75.4)          | 65.6 (55.0, 76.3)          | -0.85 (-10.24, 8.54)          | <b>0.86</b>         | 7.19 (-6.24, 20.62)          | <b>0.29</b>   |
| <b>Sleep Tranquility Score</b> | 76.9 (71.0, 82.9)          | 77.5 (71.1, 83.9)          | 0.53 (-3.09, 4.15)          | <b>0.77</b> | 78.0 (72.1, 84.0)          | 74.5 (68.2, 80.8)          | -3.55 (-7.09, -0.01)          | <b>0.049*</b>       | -4.08 (-9.15, 0.98)          | <b>0.11</b>   |
| <b>Stay Active Score</b>       | 73.9 (69.5, 78.4)          | 75.0 (70.2, 79.8)          | 1.05 (-2.44, 4.55)          | <b>0.55</b> | 77.2 (72.8, 81.6)          | 80.5 (75.7, 85.2)          | 3.24 (-0.10, 6.57)            | <b>0.06</b>         | 2.18 (-2.65, 7.01)           | <b>0.38</b>   |
| <b>Steps</b>                   | 8871.4 (7194.2, 10548.6)   | 8613.9 (6708.9, 10518.9)   | -257.48 (-1756.20, 1241.23) | <b>0.74</b> | 8555.4 (6879.5, 10231.4)   | 6056.6 (4189.0, 7924.1)    | -2498.89 (-3939.91, -1057.88) | <b>&lt;0.001***</b> | -2241.41 (-4320.51, -162.31) | <b>0.035#</b> |
| <b>Target Calories</b>         | 402.9 (359.8, 446.1)       | 415.4 (371.6, 459.1)       | 12.45 (-20.48, 45.38)       | <b>0.46</b> | 425.6 (382.5, 468.7)       | 426.6 (383.6, 469.7)       | 1.07 (-30.65, 32.79)          | <b>0.95</b>         | -11.38 (-57.11, 34.34)       | <b>0.63</b>   |
| <b>Temperature Deviation</b>   | -0.061 (-0.111, -0.010)    | -0.088 (-0.162, -0.013)    | -0.0271 (-0.1020, 0.0477)   | <b>0.48</b> | -0.020 (-0.069, 0.030)     | -0.007 (-0.079, 0.065)     | 0.0125 (-0.0607, 0.0856)      | <b>0.74</b>         | 0.0396 (-0.0650, 0.1442)     | <b>0.46</b>   |
| <b>Temperature Score</b>       | 89.5 (86.9, 92.0)          | 88.4 (83.9, 92.8)          | -1.12 (-6.19, 3.95)         | <b>0.66</b> | 89.2 (86.7, 91.7)          | 85.9 (81.6, 90.2)          | -3.30 (-8.27, 1.67)           | <b>0.19</b>         | -2.18 (-9.28, 4.92)          | <b>0.55</b>   |
| <b>Total Bedtime</b>           | 29310.3 (27908.0, 30712.6) | 28048.3 (26486.0, 29610.6) | -1261.99 (-2803.55, 279.56) | <b>0.11</b> | 29103.3 (27706.1, 30500.6) | 29774.0 (28230.8, 31317.3) | 670.68 (-851.56, 2192.92)     | <b>0.39</b>         | 1932.67 (-233.80, 4099.15)   | <b>0.08</b>   |
| <b>Total Burn</b>              | 2611.2 (2430.3, 2792.0)    | 2626.2 (2457.5, 2794.9)    | 15.00 (-106.66, 136.67)     | <b>0.81</b> | 2590.0 (2409.3, 2770.8)    | 2532.7 (2367.2, 2698.2)    | -57.33 (-174.56, 59.90)       | <b>0.34</b>         | -72.33 (-241.29, 96.62)      | <b>0.40</b>   |

|                                 |                               |                               |                            |             |                               |                               |                            |                |                            |             |
|---------------------------------|-------------------------------|-------------------------------|----------------------------|-------------|-------------------------------|-------------------------------|----------------------------|----------------|----------------------------|-------------|
| <b>Total Sleep Score</b>        | 78.7<br>(74.0, 83.4)          | 76.6 (71.5, 81.6)             | -2.13 (-6.94, 2.68)        | <b>0.39</b> | 79.1 (74.5, 83.8)             | 77.5 (72.4, 82.5)             | -1.66 (-6.41, 3.08)        | <b>0.49</b>    | 0.47 (-6.29, 7.22)         | <b>0.89</b> |
| <b>Total Sleep Time</b>         | 25305.6<br>(24042.3, 26569.0) | 24568.6<br>(23321.1, 25816.1) | -737.01 (-1955.14, 481.12) | <b>0.24</b> | 25840.0<br>(24580.9, 27099.2) | 25469.4<br>(24234.4, 26704.3) | -370.67 (-1575.01, 833.66) | <b>0.55</b>    | 366.34 (-1346.64, 2079.31) | <b>0.68</b> |
| <b>Training Frequency Score</b> | 57.6<br>(41.7, 73.5)          | 49.4 (29.8, 69.1)             | -8.20 (-25.24, 8.84)       | <b>0.35</b> | 76.7 (60.9, 92.6)             | 54.4 (35.3, 73.5)             | -22.31 (-38.66, -5.96)     | <b>0.007**</b> | -14.11 (-37.72, 9.51)      | <b>0.24</b> |
| <b>Training Volume Score</b>    | 74.8<br>(63.9, 85.6)          | 63.6 (47.7, 79.5)             | -11.21 (-23.00, 0.58)      | <b>0.06</b> | 81.3 (70.4, 92.1)             | 63.2 (47.6, 78.8)             | -18.07 (-29.37, -6.78)     | <b>0.002**</b> | -6.87 (-23.19, 9.46)       | <b>0.41</b> |

All data is presented as means (95% confidence interval). For data with statistical outliers, winsorised data was used to generate means, confidence intervals, and *p* values.

\*within-group *p* value less than 0.05

\*\*within group *p* value less than 0.01

\*\*\*within group *p* value less than 0.001

#between group *p* value less than 0.05
