# Supplementary material
Source: PubMed Central journal article supplement (PMC7522780)
Supplement: jamainternmed-e204153-s004.pdf [file jamainternmed-e204153-s004.pdf]

## Data Sharing Statement

Lowe. Effects of Time-Restricted Eating on Weight Loss and Other Metabolic Parameters in Women and Men With Overweight and Obesity. *JAMA Intern Med*. Published September 28, 2020. 10.1001/jamainternmed.2020.4153

### Data

**Data available:** Yes

**Data types:** Deidentified participant data

**How to access data:** email

**When available:** With publication

### Supporting Documents

**Document types:** None

### Additional Information

**Who can access the data:** Anyone who requests

**Types of analyses:** for any purpose

**Mechanisms of data availability:** with or without investigator support
